# Supplementary material for: Ru(ii)–arene azole complexes as anti-amyloid-β agents
Source: Royal Society of Chemistry journal article supplement (doi:10.1039/d4dt01740d), 2024-01-01
Supplement: d4dt01740d1.pdf [file d4dt01740d1.pdf]

## Supplementary Information For: Ru-Arene Azole Complexes as Anti-Amyloid- $\beta$ Agents

Ryan M. Hacker,<sup>1</sup> Daniela M. Grimard,<sup>1</sup> Katie A. Morgan,<sup>1</sup> Eaman Saleh,<sup>2</sup> Morgan M. Wrublik,<sup>2</sup> Cade J. Meiss,<sup>2</sup> Caitlyn C. Kant,<sup>2</sup> Marjorie A. Jones,<sup>2</sup> William W. Brennessel,<sup>3</sup> Michael I. Webb<sup>1\*</sup>

1 Department of Chemistry and Biochemistry, SUNY Geneseo, Geneseo, NY, 14454

2 Department of Chemistry, Illinois State University, Normal, IL, 61790

3 Department of Chemistry, University of Rochester, Rochester, NY, 14627

Corresponding Author: Michael I. Webb, [mwebb@geneseo.edu](mailto:mwebb@geneseo.edu)

### Table of Contents:

- **Figures S1-S10:** <sup>1</sup>H and <sup>13</sup>C NMR spectra for the prepared Ru complexes.
- **Figures S11-S15:** UV-Vis spectra for the prepared Ru complexes in PBS.
- **Figures S16-S20:** UV-Vis spectra for the prepared Ru complexes in H<sub>2</sub>O.
- **Figures S21-S25:** <sup>1</sup>H spectra for the prepared Ru complexes in 10% DMSO-D<sub>6</sub> in D<sub>2</sub>O.
- **Table S1:** Simplified molecular-input line-entry system (SMILES) for each Ru complex.
- **Figures S26-S30:** UV-Vis spectra for the prepared Ru complexes with A $\beta$ <sub>16</sub> in PBS.
- **Figures S31-S35:** <sup>1</sup>H spectra for the prepared Ru complexes with histidine.
- **Figures S36-S40:** UV-Vis spectra for the prepared Ru complexes with histidine in PBS.
- **Figure S41:** Additional TEM images collected for all of the Ru complexes with A $\beta$ <sub>42</sub> from the DLS filtrates.
- **Figure S42-46:** Fluorescence emission spectra at various Ru-HSA ratios by the titration of HSA-DG (1:1) with each Ru complex.
- **Tables S2-S4:** Refinement parameters for the X-ray crystal structures of **RuO**, **RuS**, and **RuBO**.

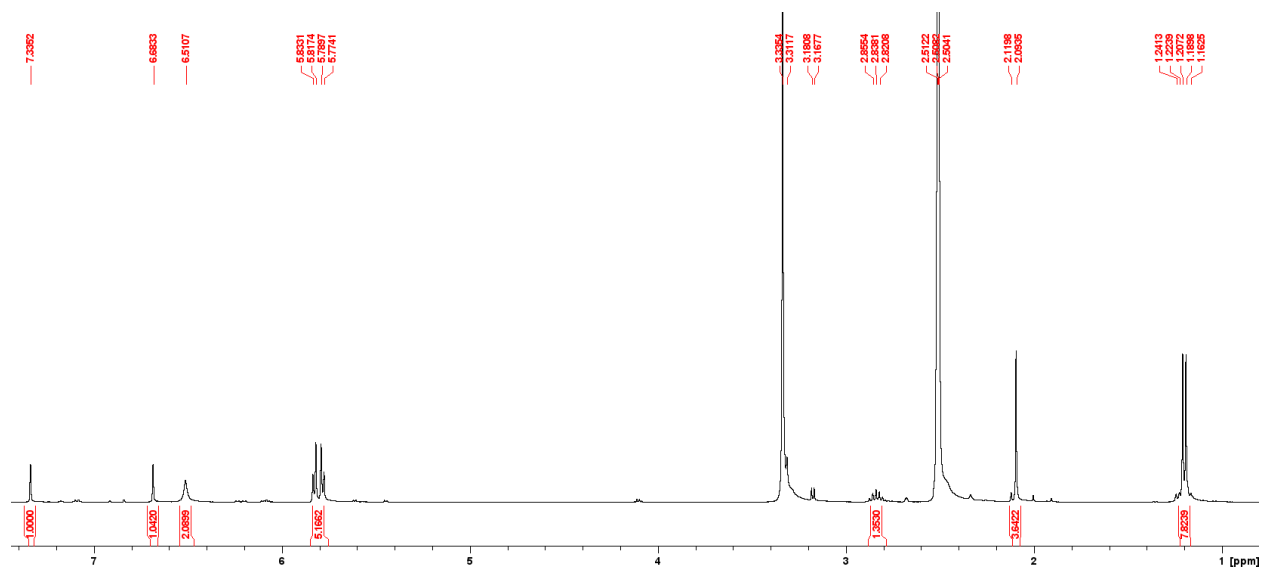

Figure S1. <sup>1</sup>H NMR spectrum of complex RuO in DMSO-D<sub>6</sub>.

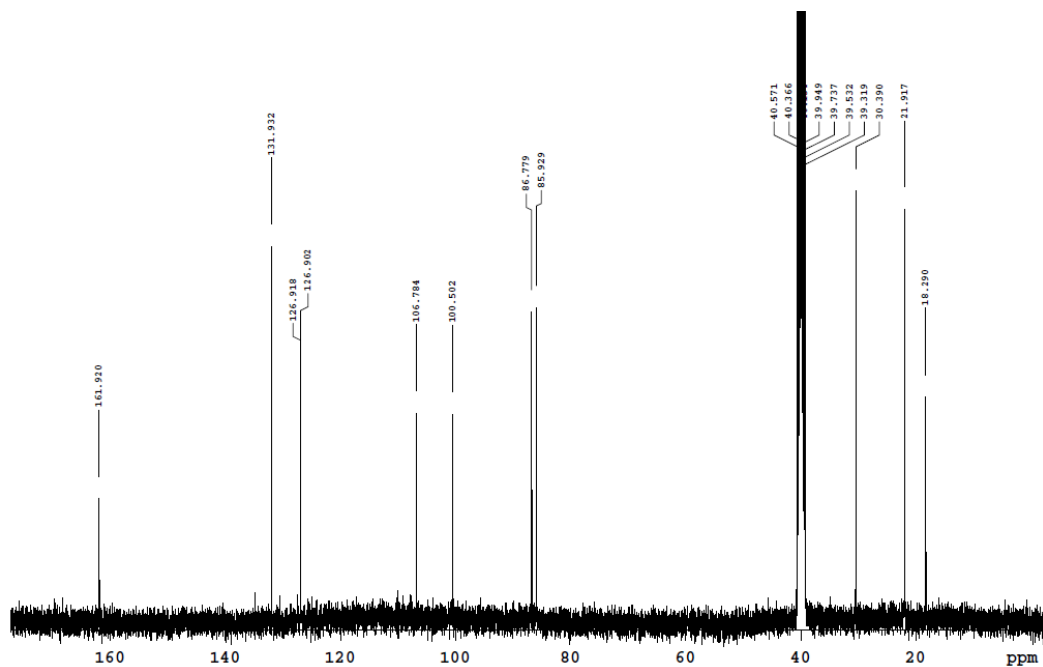

Figure S2. <sup>13</sup>C NMR spectrum of complex RuO in DMSO-D<sub>6</sub>.

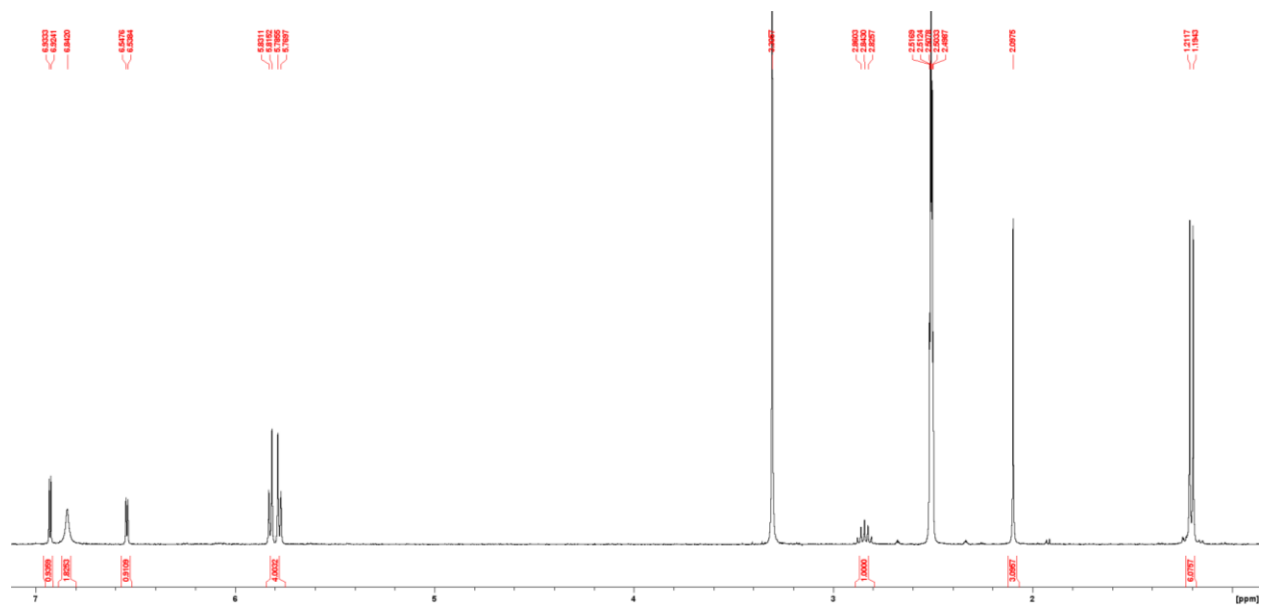

**Figure S3.**  $^1\text{H}$  NMR spectrum of complex **RuS** in  $\text{DMSO-}D_6$ .

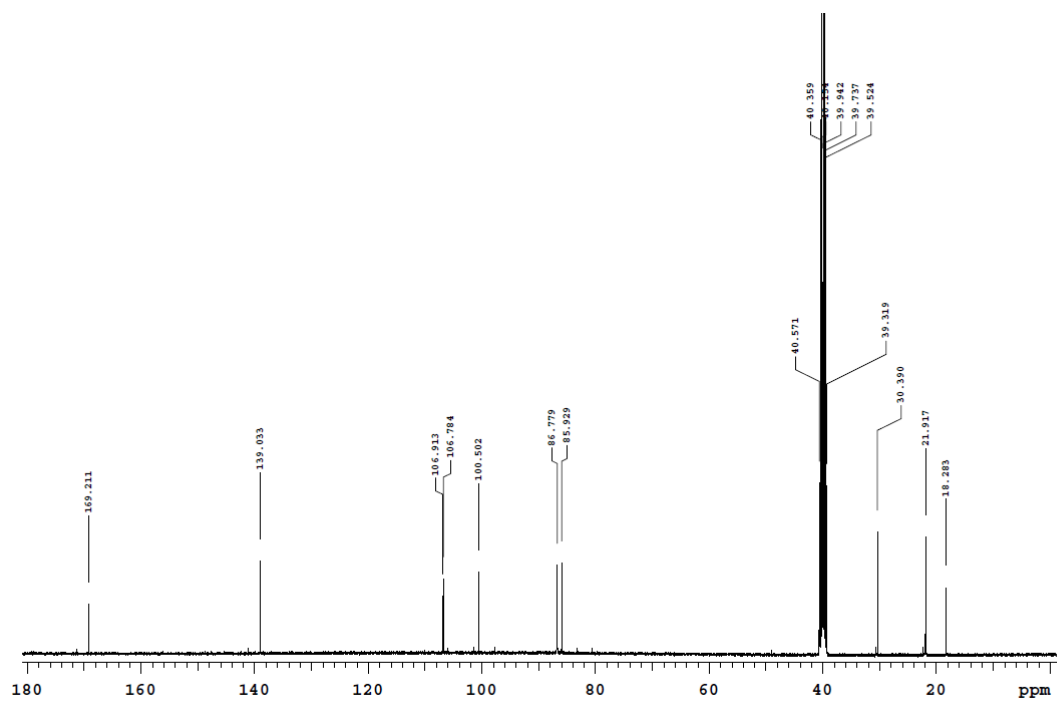

**Figure S4.**  $^{13}\text{C}$  NMR spectrum of complex **RuS** in  $\text{DMSO-}D_6$ .

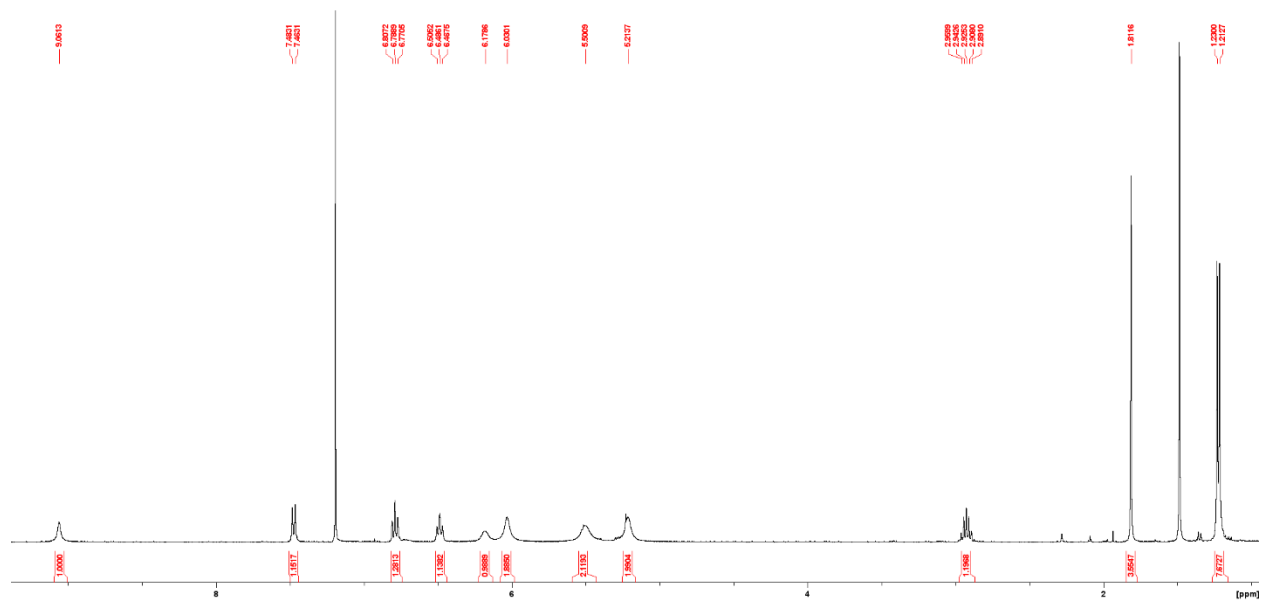

Figure S5.  $^1\text{H}$  NMR spectrum of complex **RuBN** in  $\text{CDCl}_3$ .

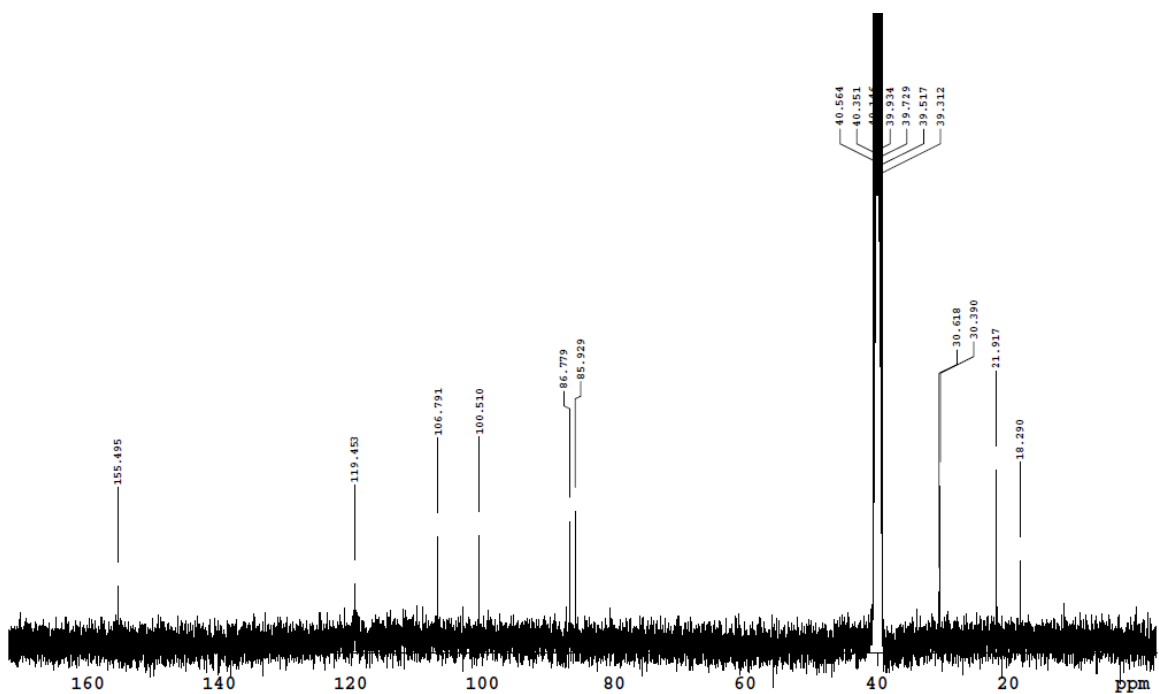

Figure S6.  $^{13}\text{C}$  NMR spectrum of complex **RuBN** in  $\text{DMSO}-\text{D}_6$ .

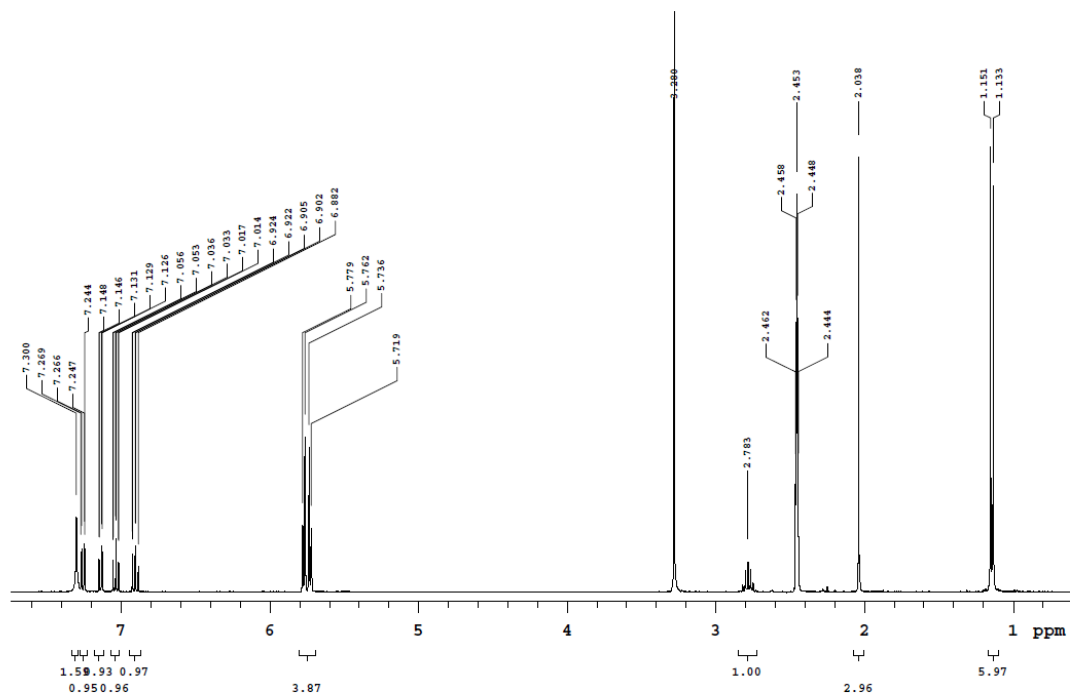

Figure S7.  $^1\text{H}$  NMR spectrum of complex **RuBO** in  $\text{DMSO-D}_6$ .

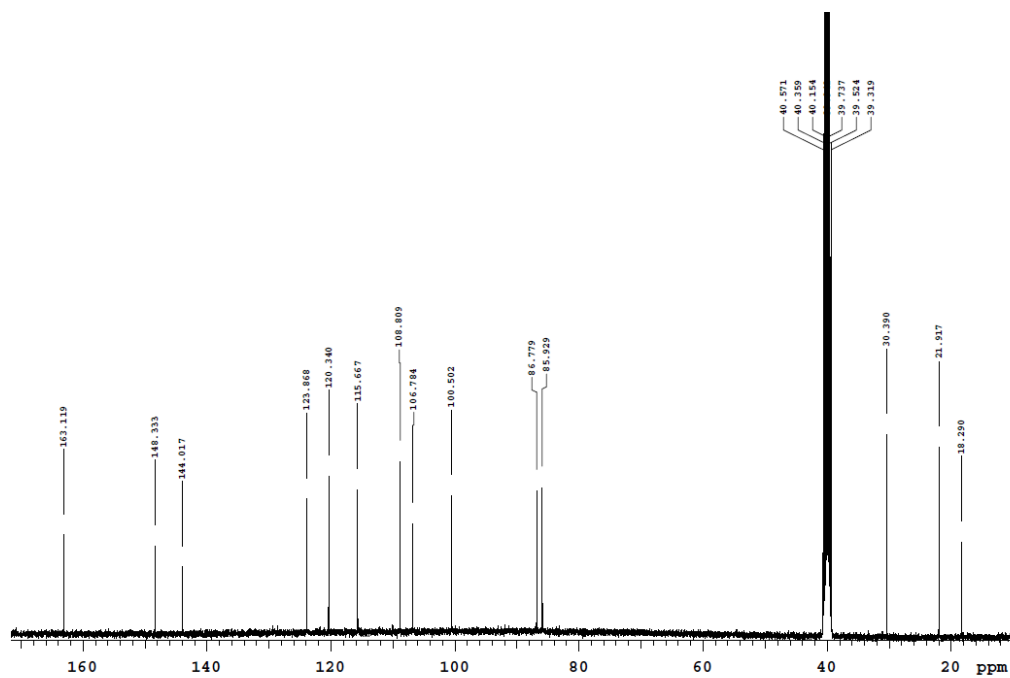

Figure S8.  $^{13}\text{C}$  NMR spectrum of complex **RuBO** in  $\text{DMSO-D}_6$ .

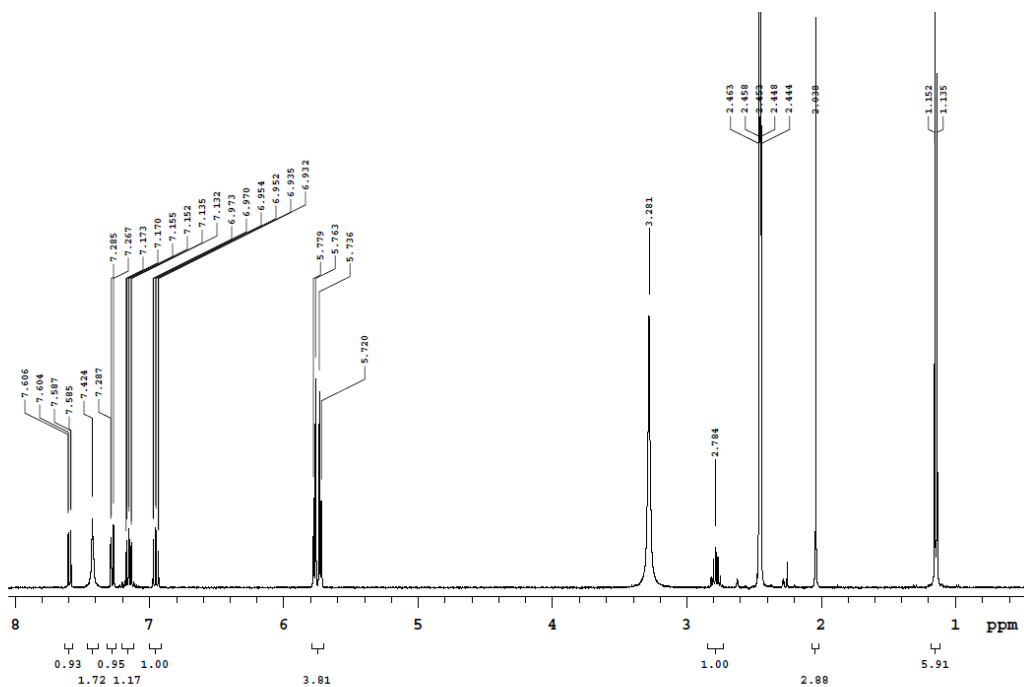

**Figure S9.**  $^1\text{H}$  NMR spectrum of complex **RuBS** in  $\text{DMSO-D}_6$ .

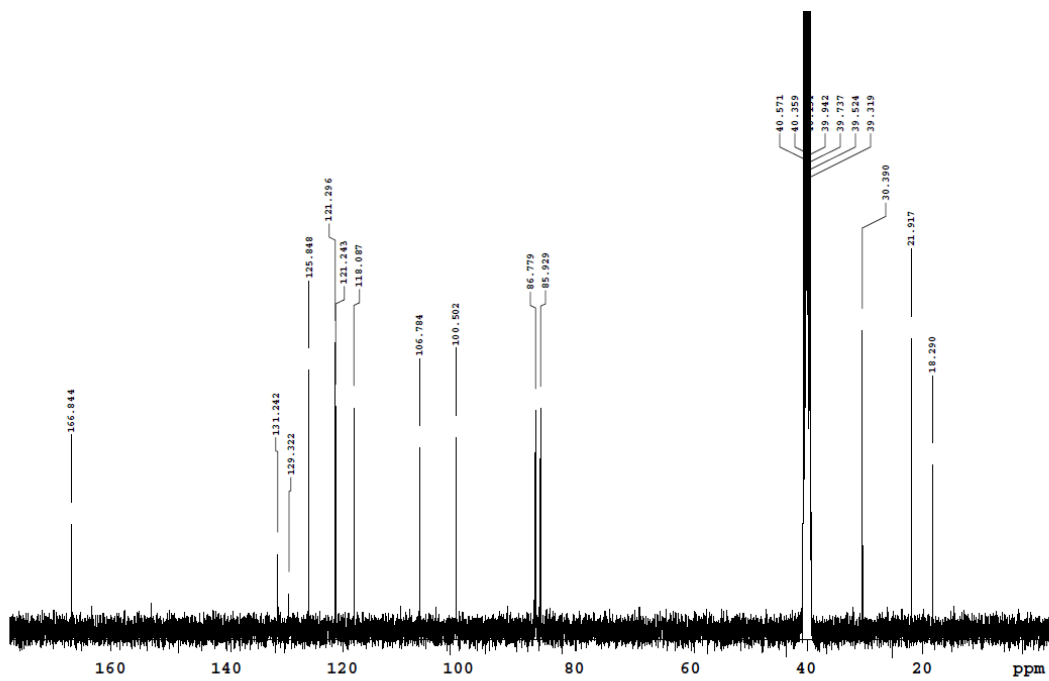

**Figure S10.**  $^{13}\text{C}$  NMR spectrum of complex **RuBS** in  $\text{DMSO-D}_6$ .

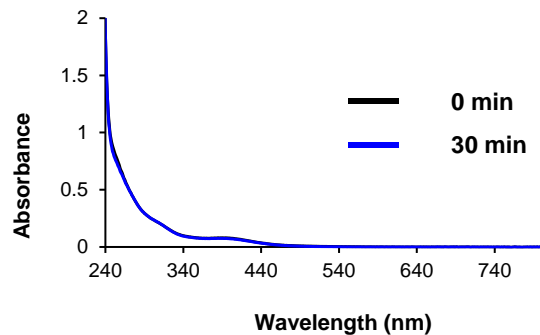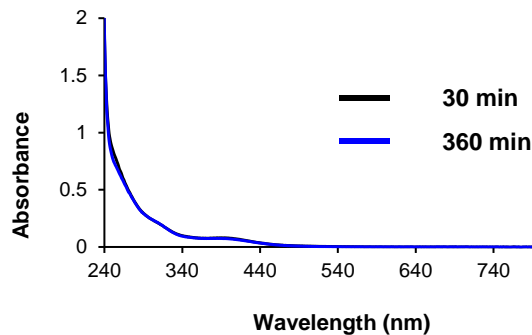

**Figure S11.** UV-Vis spectra of complex **RuO** (100  $\mu\text{M}$ ) incubated in PBS (pH 7.4) at 37  $^{\circ}\text{C}$  for 30 minutes (left) then for 6 hours (right).

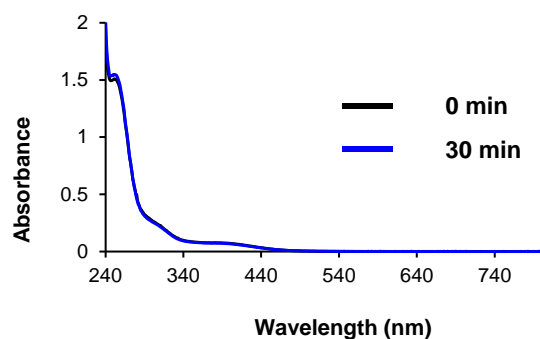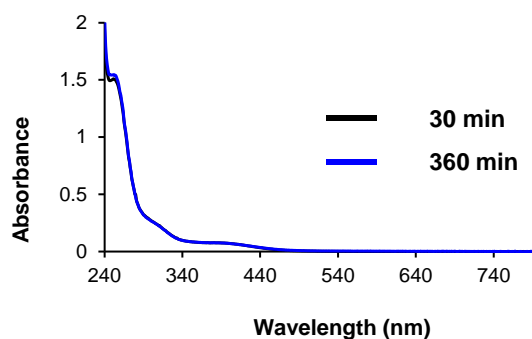

**Figure S12.** UV-Vis spectra of complex **RuS** (100  $\mu\text{M}$ ) incubated in PBS (pH 7.4) at 37  $^{\circ}\text{C}$  for 30 minutes (left) then for 6 hours (right).

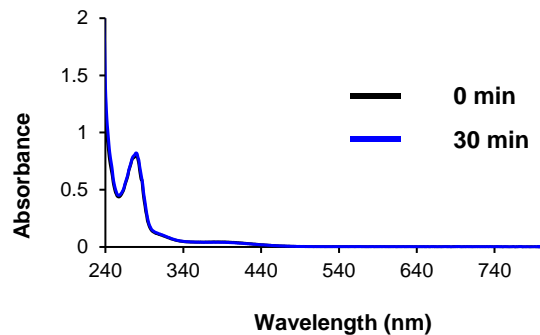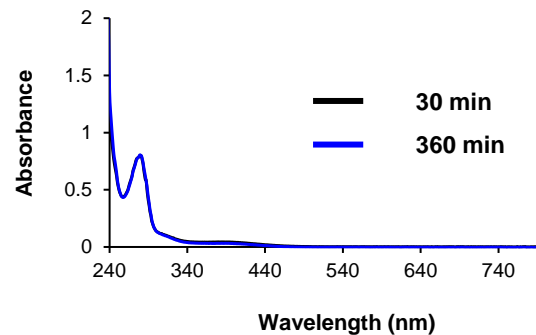

**Figure S13.** UV-Vis spectra of complex **RuBN** (100  $\mu$ M) incubated in PBS (pH 7.4) at 37  $^{\circ}$ C for 30 minutes (left) then for 6 hours (right).

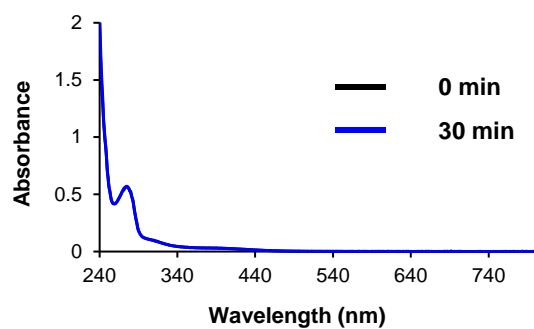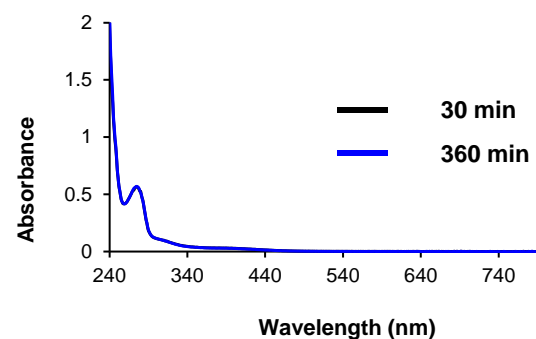

**Figure S14.** UV-Vis spectra of complex **RuBO** (100  $\mu$ M) incubated in PBS (pH 7.4) at 37  $^{\circ}$ C for 30 minutes (left) then for 6 hours (right).



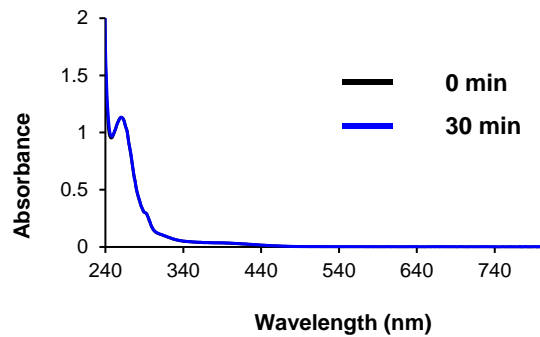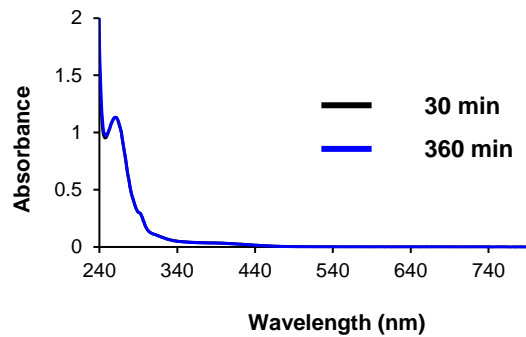

**Figure S15.** UV-Vis spectra of complex **RuBS** (100 μM) incubated in PBS (pH 7.4) at 37 °C for 30 minutes (left) then for 6 hours (right).

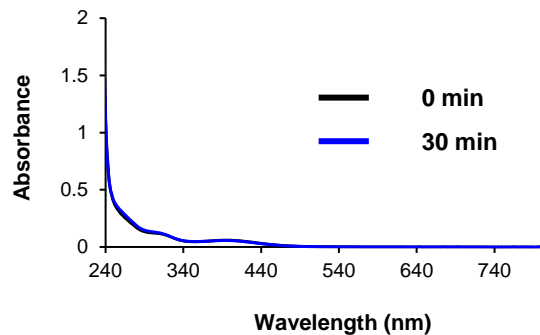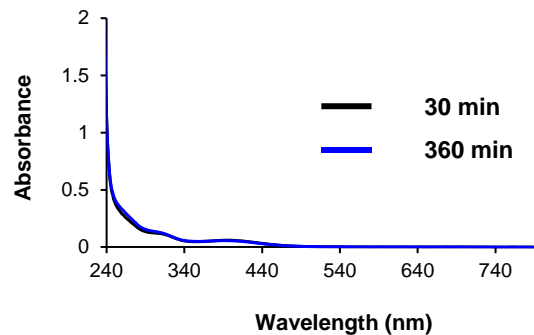

**Figure S16.** UV-Vis spectra of complex **RuO** (100  $\mu$ M) incubated in H<sub>2</sub>O at room temperature for 30 minutes (left) then for 6 hours (right).

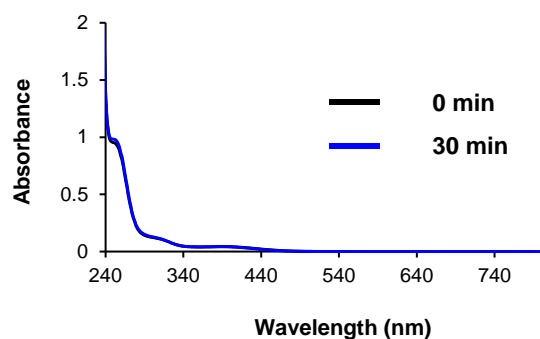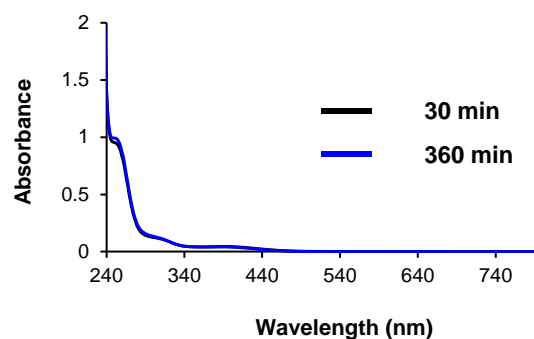

**Figure S17.** UV-Vis spectra of complex **RuS** (100  $\mu$ M) incubated in H<sub>2</sub>O at room temperature for 30 minutes (left) then for 6 hours (right).

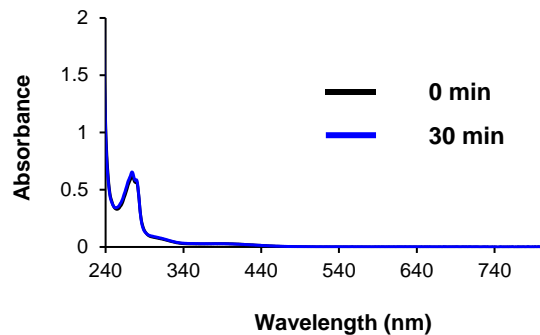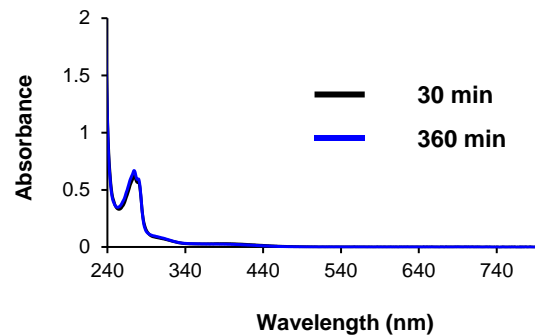

**Figure S18.** UV-Vis spectra of complex **RuBN** (100  $\mu\text{M}$ ) incubated in  $\text{H}_2\text{O}$  at room temperature for 30 minutes (left) then for 6 hours (right).

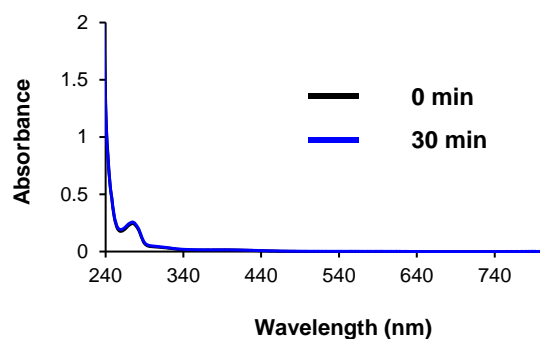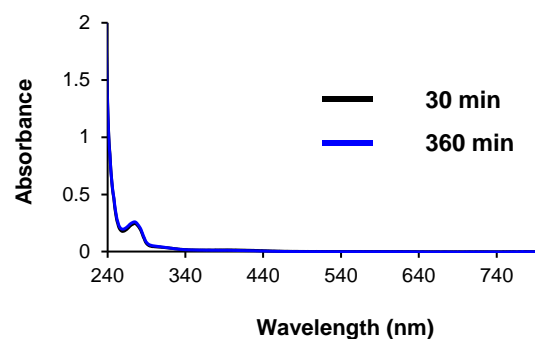

**Figure S19.** UV-Vis spectra of complex **RuBO** (100  $\mu\text{M}$ ) incubated in  $\text{H}_2\text{O}$  at room temperature for 30 minutes (left) then for 6 hours (right).

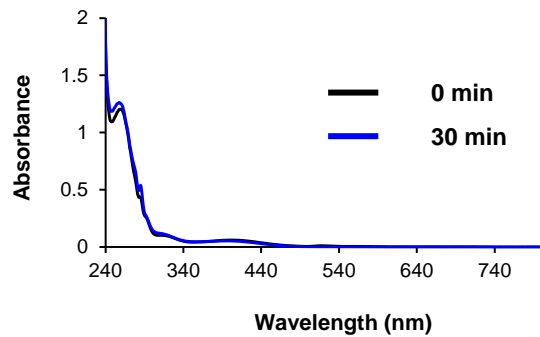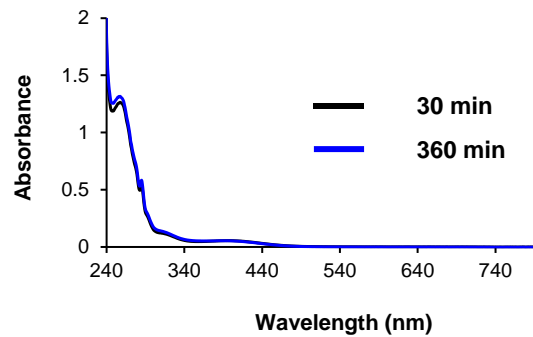

**Figure S20.** UV-Vis spectra of complex **RuBS** (100 μM) incubated in H<sub>2</sub>O at room temperature for 30 minutes (left) then for 6 hours (right).

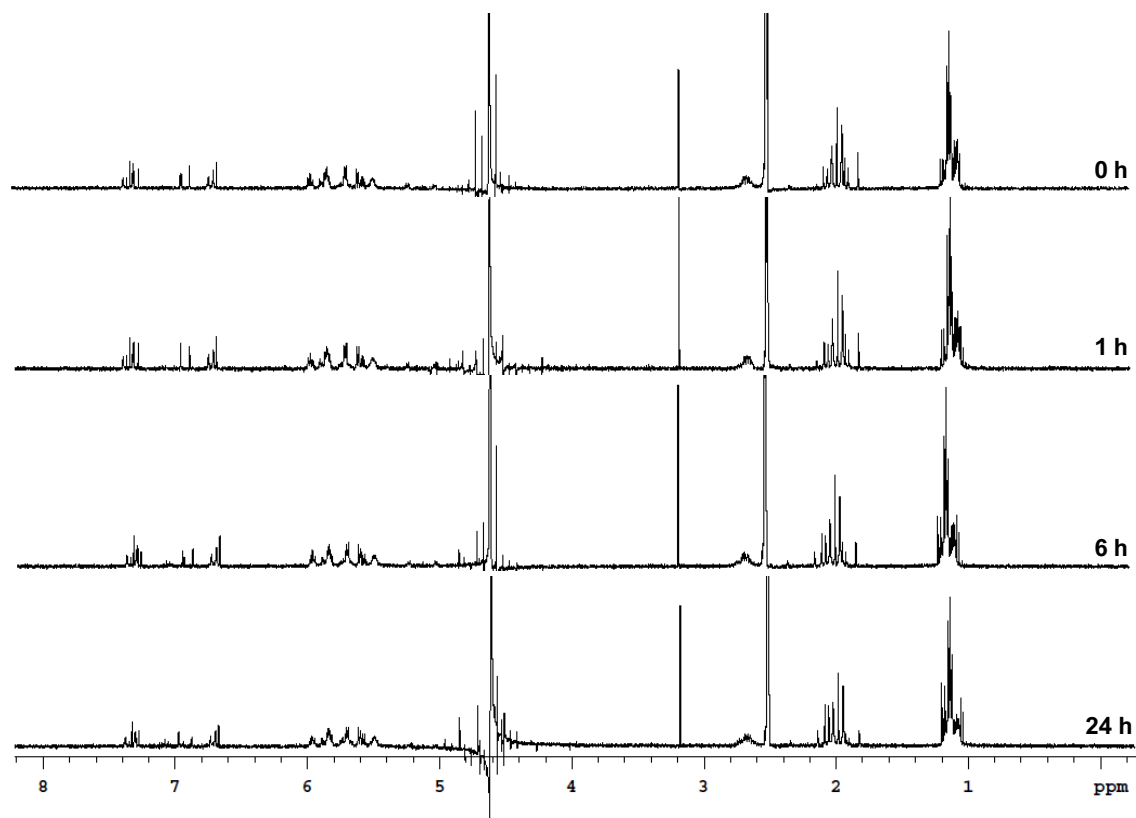

**Figure S21.**  $^1\text{H}$  NMR spectrum of complex **RuO** in 10%  $\text{DMSO-}D_6$  and  $\text{D}_2\text{O}$  over 24 hours.

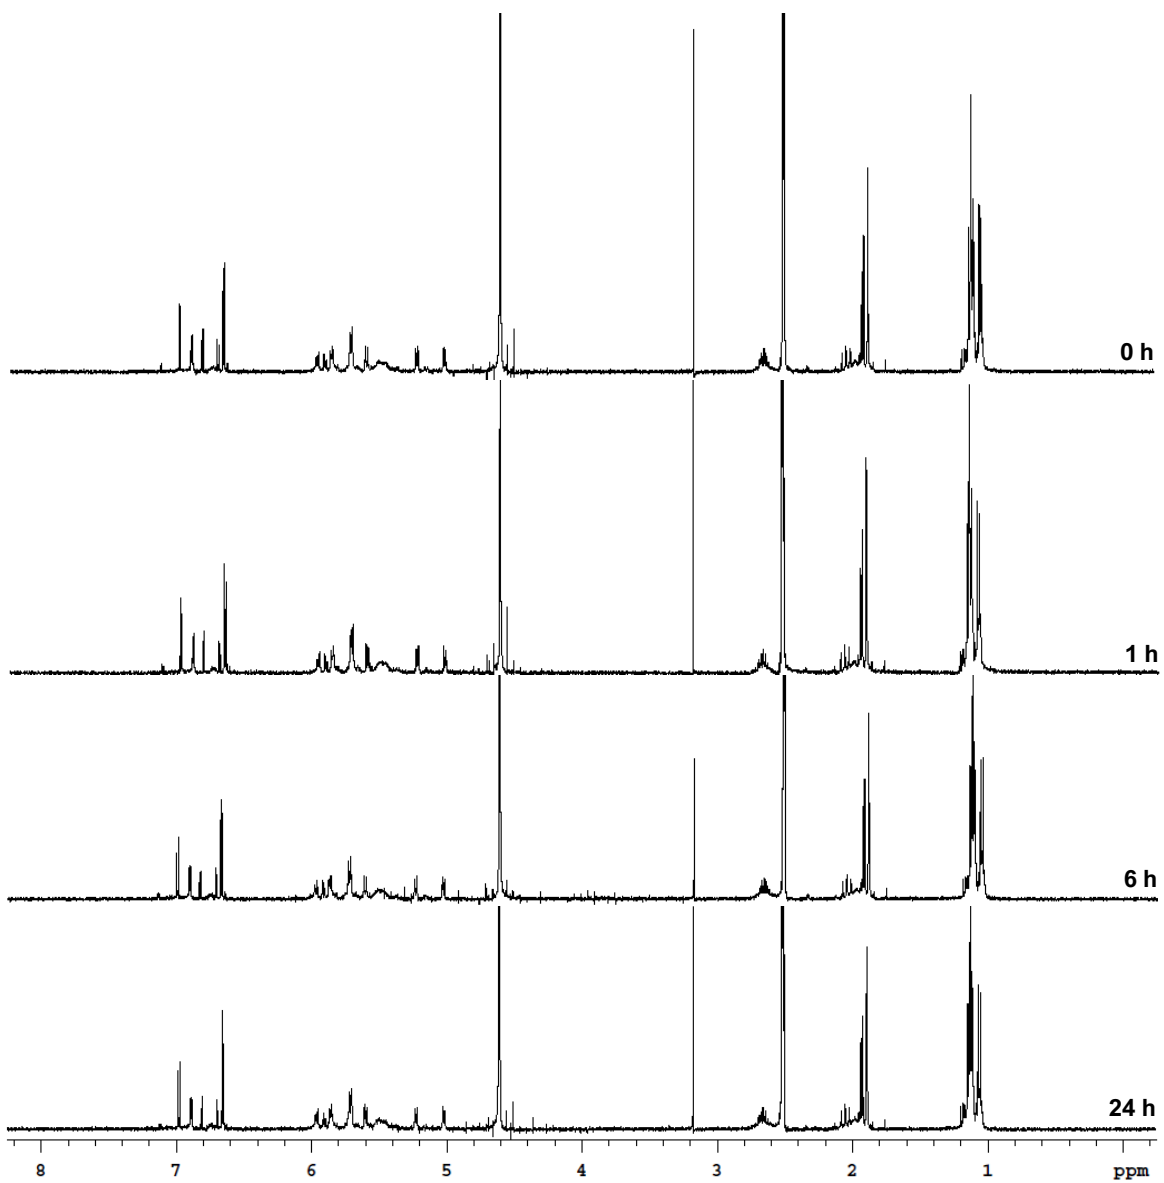

**Figure S22.** <sup>1</sup>H NMR spectrum of complex **RuS** in 10% DMSO-D<sub>6</sub> and D<sub>2</sub>O over 24 hours.

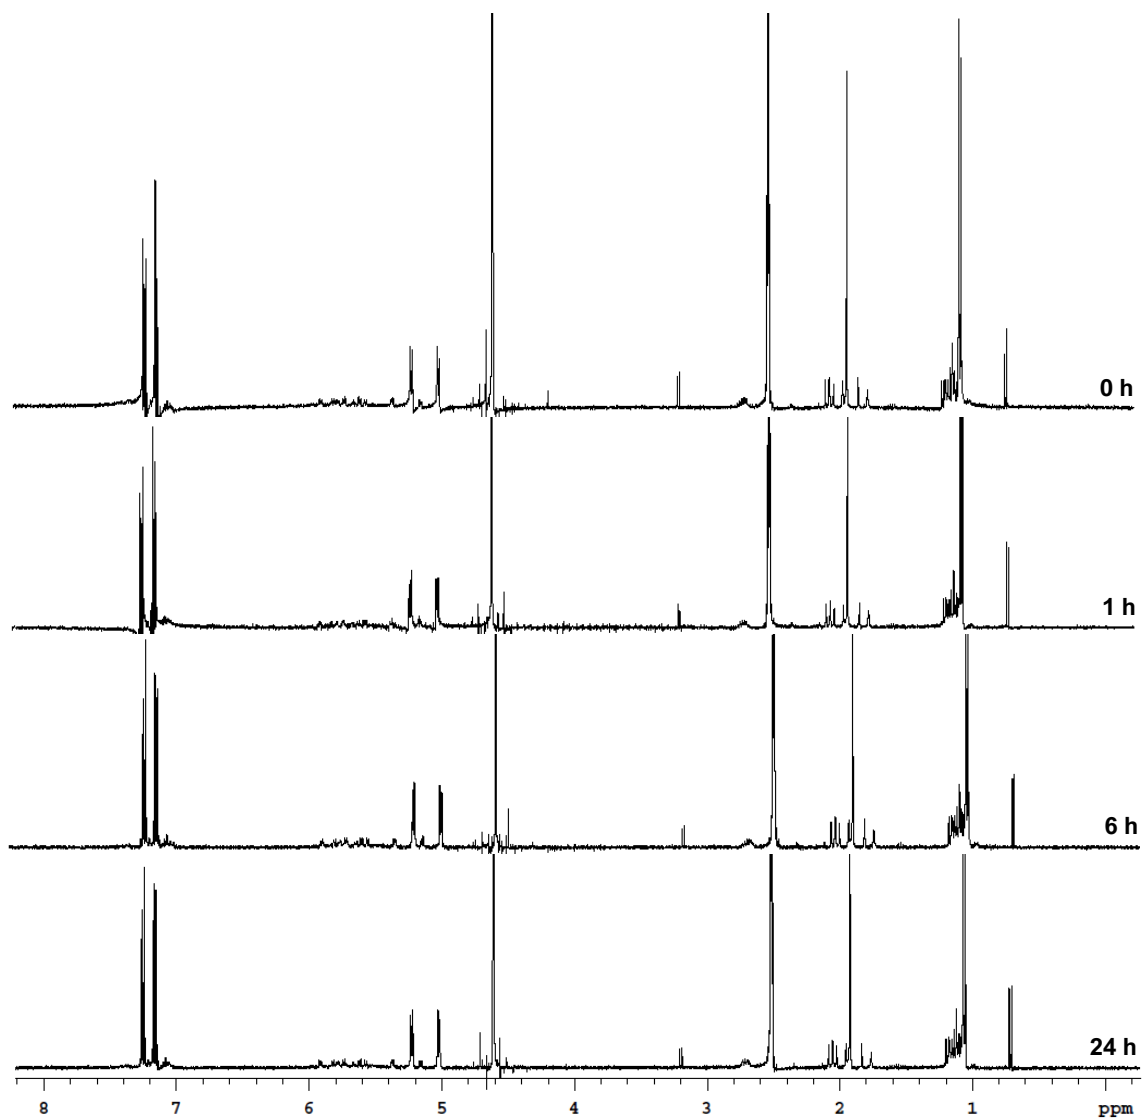

**Figure S23.** <sup>1</sup>H NMR spectrum of complex **RuBN** in 10% DMSO-D<sub>6</sub> and D<sub>2</sub>O over 24 hours.

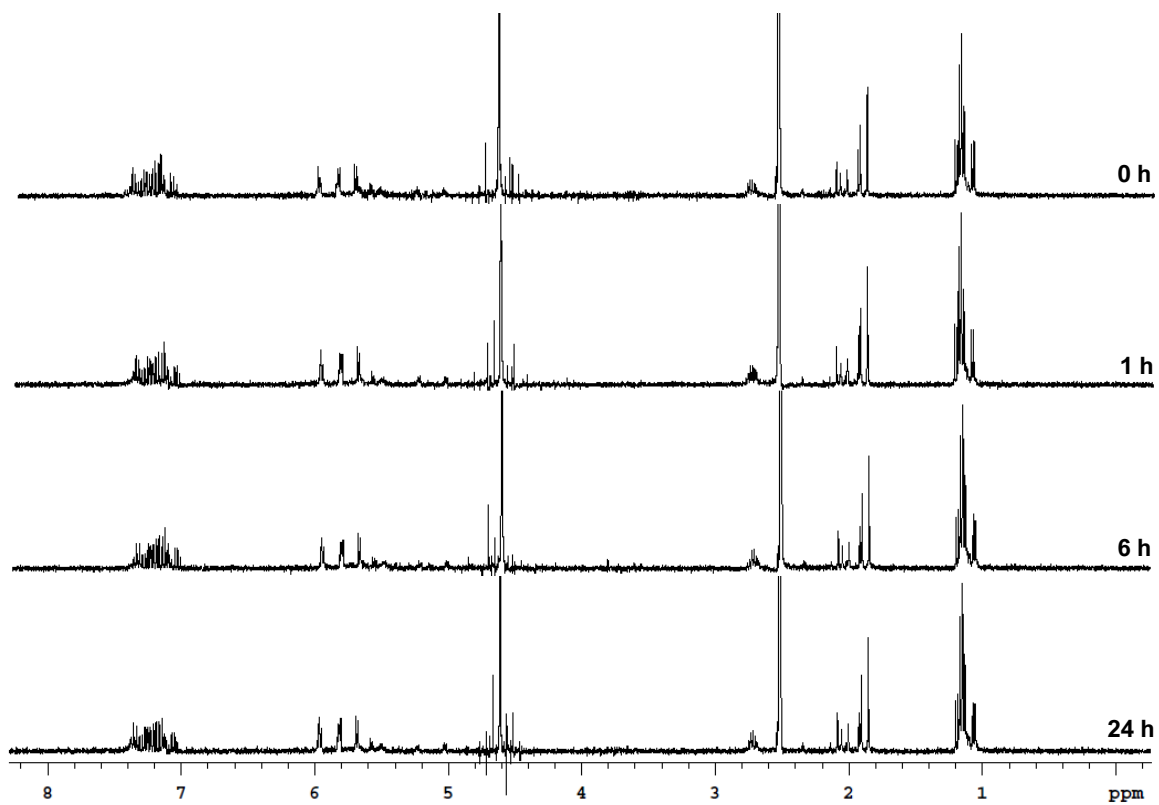

**Figure S24.**  $^1\text{H}$  NMR spectrum of complex RuBO in 10%  $\text{DMSO-D}_6$  and  $\text{D}_2\text{O}$  over 24 hours.



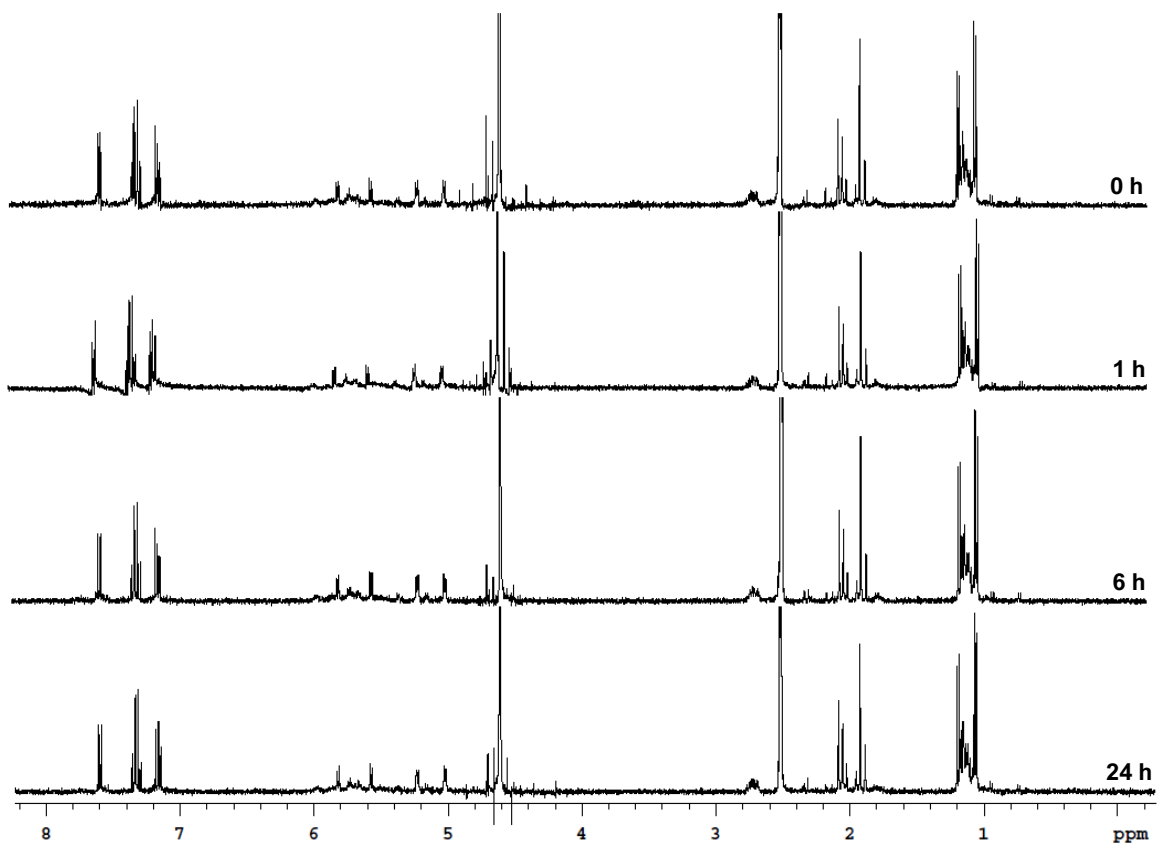

**Figure S25.** <sup>1</sup>H NMR spectrum of complex RuBS in 10% DMSO-D<sub>6</sub> and D<sub>2</sub>O over 24 hours.

| Complex     | SMILES                                                                        |
|-------------|-------------------------------------------------------------------------------|
| <b>RuO</b>  | <chem>Nc1occn1[Ru]12345(Cl)(Cl)C6=C3[C]5(=C2C1=[C]46C)C(C)C</chem>            |
| <b>RuS</b>  | <chem>Nc1scn1[Ru]12345(Cl)(Cl)C6=C3[C]5(=C2C1=[C]46C)C(C)C</chem>             |
| <b>RuBN</b> | <chem>Nc1[nH]c2c(n1[Ru]13456(Cl)(Cl)C7=C4[C]6(=C3C1=[C]57C)C(C)C)cccc2</chem> |
| <b>RuBO</b> | <chem>Nc1oc2c(n1[Ru]13456(Cl)(Cl)C7=C4[C]6(=C3C1=[C]57C)C(C)C)cccc2</chem>    |
| <b>RuBS</b> | <chem>Nc1sc2c(n1[Ru]13456(Cl)(Cl)C7=C4[C]6(=C3C1=[C]57C)C(C)C)cccc2</chem>    |

**Table S1.** Simplified molecular-input line-entry system (SMILES) for each Ru complex used to calculate the log P values.

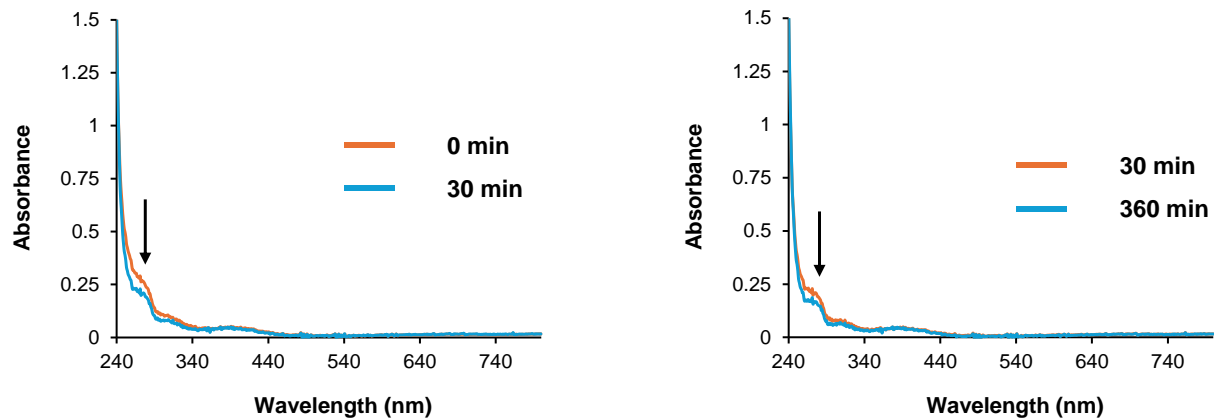

**Figure S26.** UV-Vis Spectra of **RuO** following mixing with an equimolar amount of  $A\beta_{16}$  (100  $\mu$ M) and incubation in PBS (pH 7.4) at 37  $^{\circ}$ C for 30 minutes (left) then for 6 hours (right).

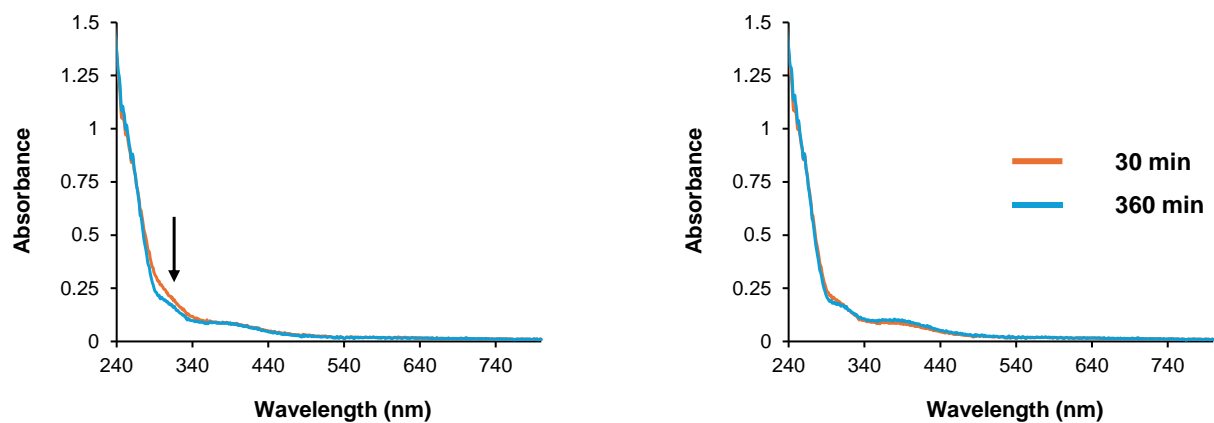

**Figure S27.** UV-Vis Spectra of **RuS** following mixing with an equimolar amount of  $A\beta_{16}$  (100  $\mu$ M) and incubation in PBS (pH 7.4) at 37  $^{\circ}$ C for 30 minutes (left) then for 6 hours (right).

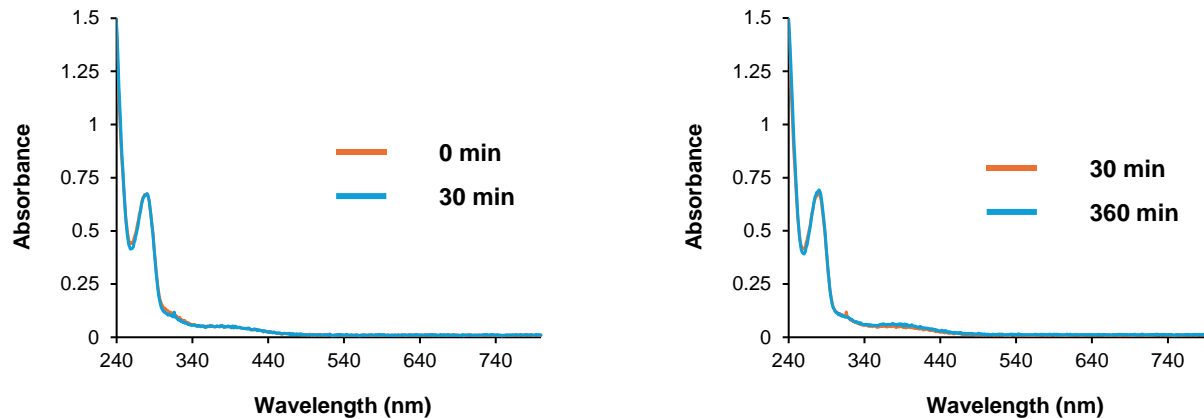

**Figure S28.** UV-Vis Spectra of **RuBN** following mixing with an equimolar amount of  $A\beta_{16}$  (100  $\mu$ M) and incubation in PBS (pH 7.4) at 37  $^{\circ}$ C for 30 minutes (left) then for 6 hours (right).

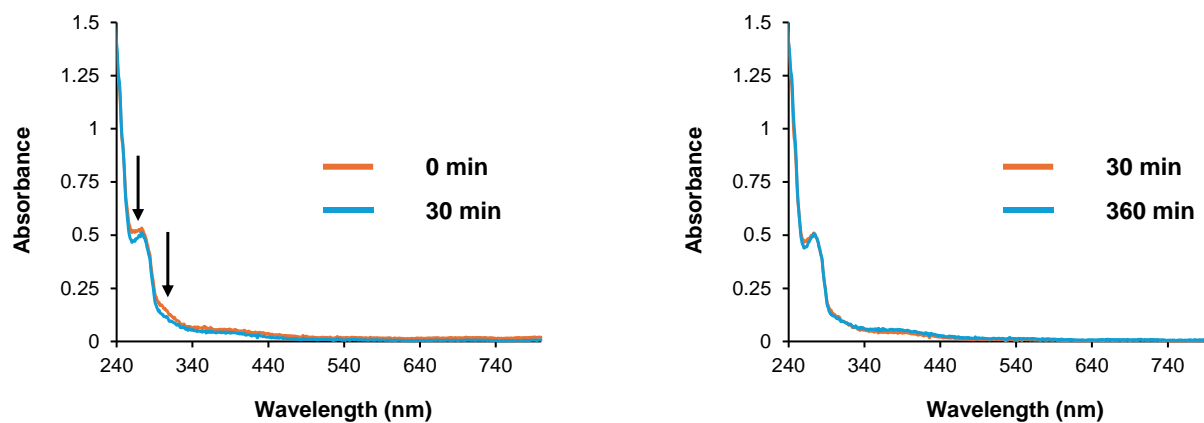

**Figure S29.** UV-Vis Spectra of **RuBO** following mixing with an equimolar amount of  $A\beta_{16}$  (100  $\mu$ M) and incubation in PBS (pH 7.4) at 37  $^{\circ}$ C for 30 minutes (left) then for 6 hours (right).

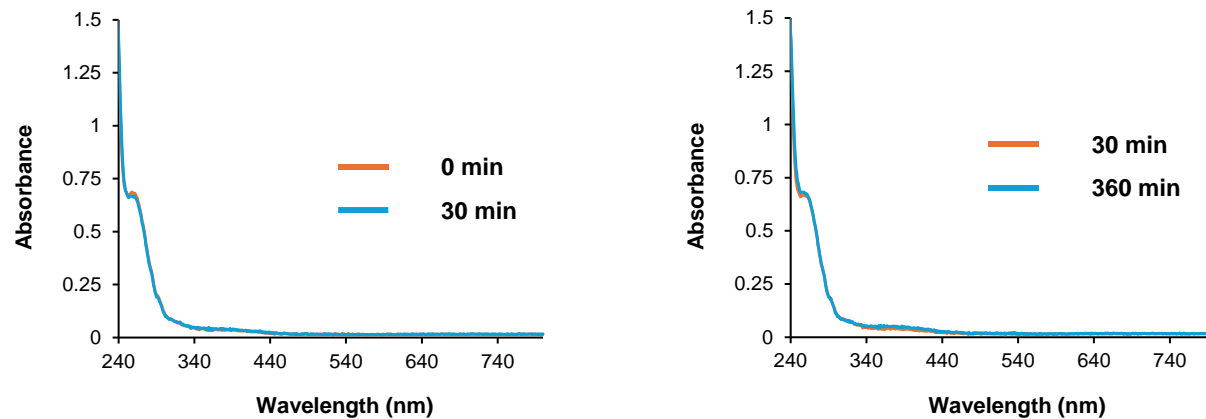

**Figure S30.** UV-Vis Spectra of **RuBS** following mixing with an equimolar amount of  $A\beta_{16}$  (100  $\mu$ M) and incubation in PBS (pH 7.4) at 37  $^{\circ}$ C for 30 minutes (left) then for 6 hours (right).

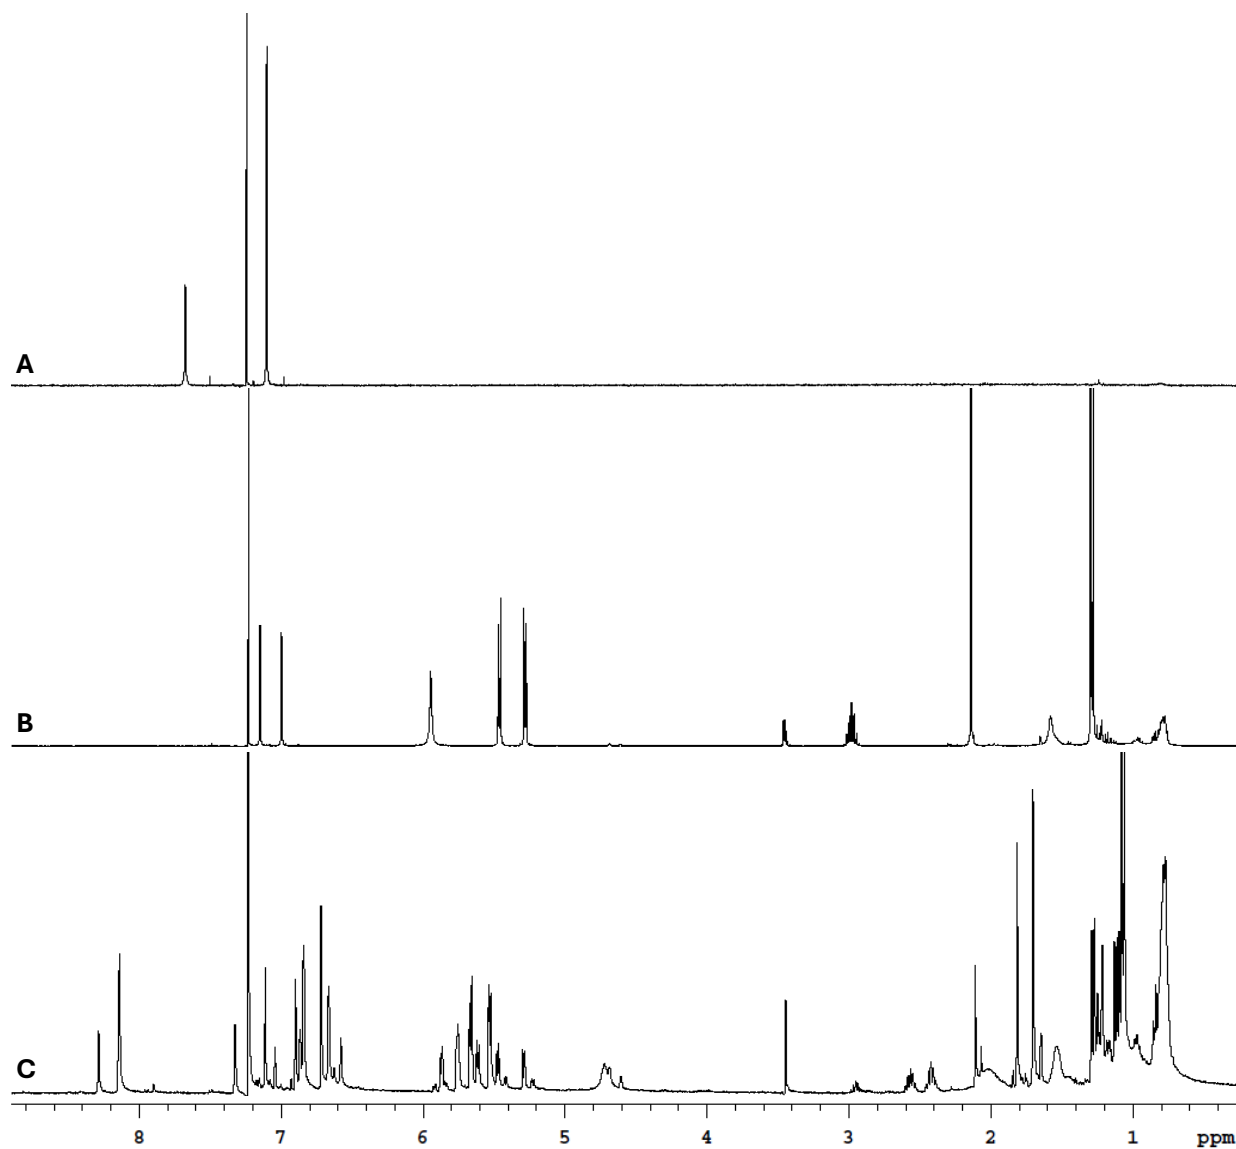

**Figure S31.** <sup>1</sup>H NMR spectra in CDCl<sub>3</sub> of complex **RuO** (18 μM) with imidazole (18 μM). A: Imidazole alone, B: **RuO** alone, C: Imidazole and **RuO** immediately after mixing.

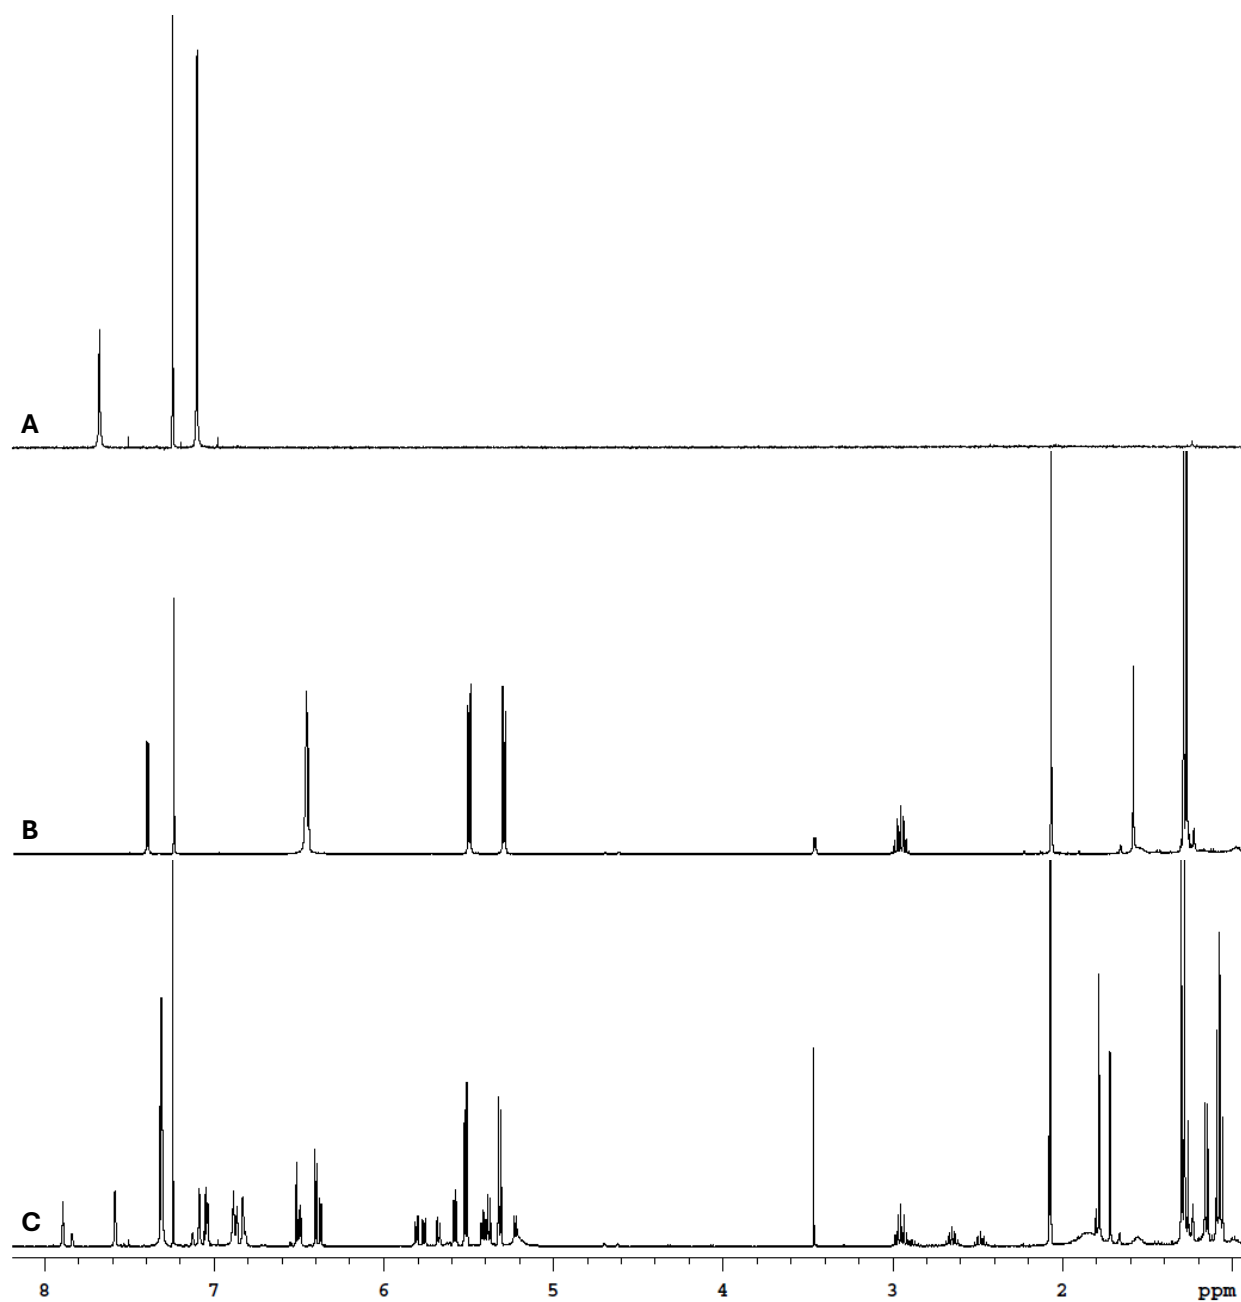

**Figure S32.**  $^1\text{H}$  NMR spectra in  $\text{CDCl}_3$  of complex **RuS** ( $18\ \mu\text{M}$ ) with imidazole ( $18\ \mu\text{M}$ ). A: Imidazole alone, B: **RuS** alone, C: Imidazole and **RuS** immediately after mixing.

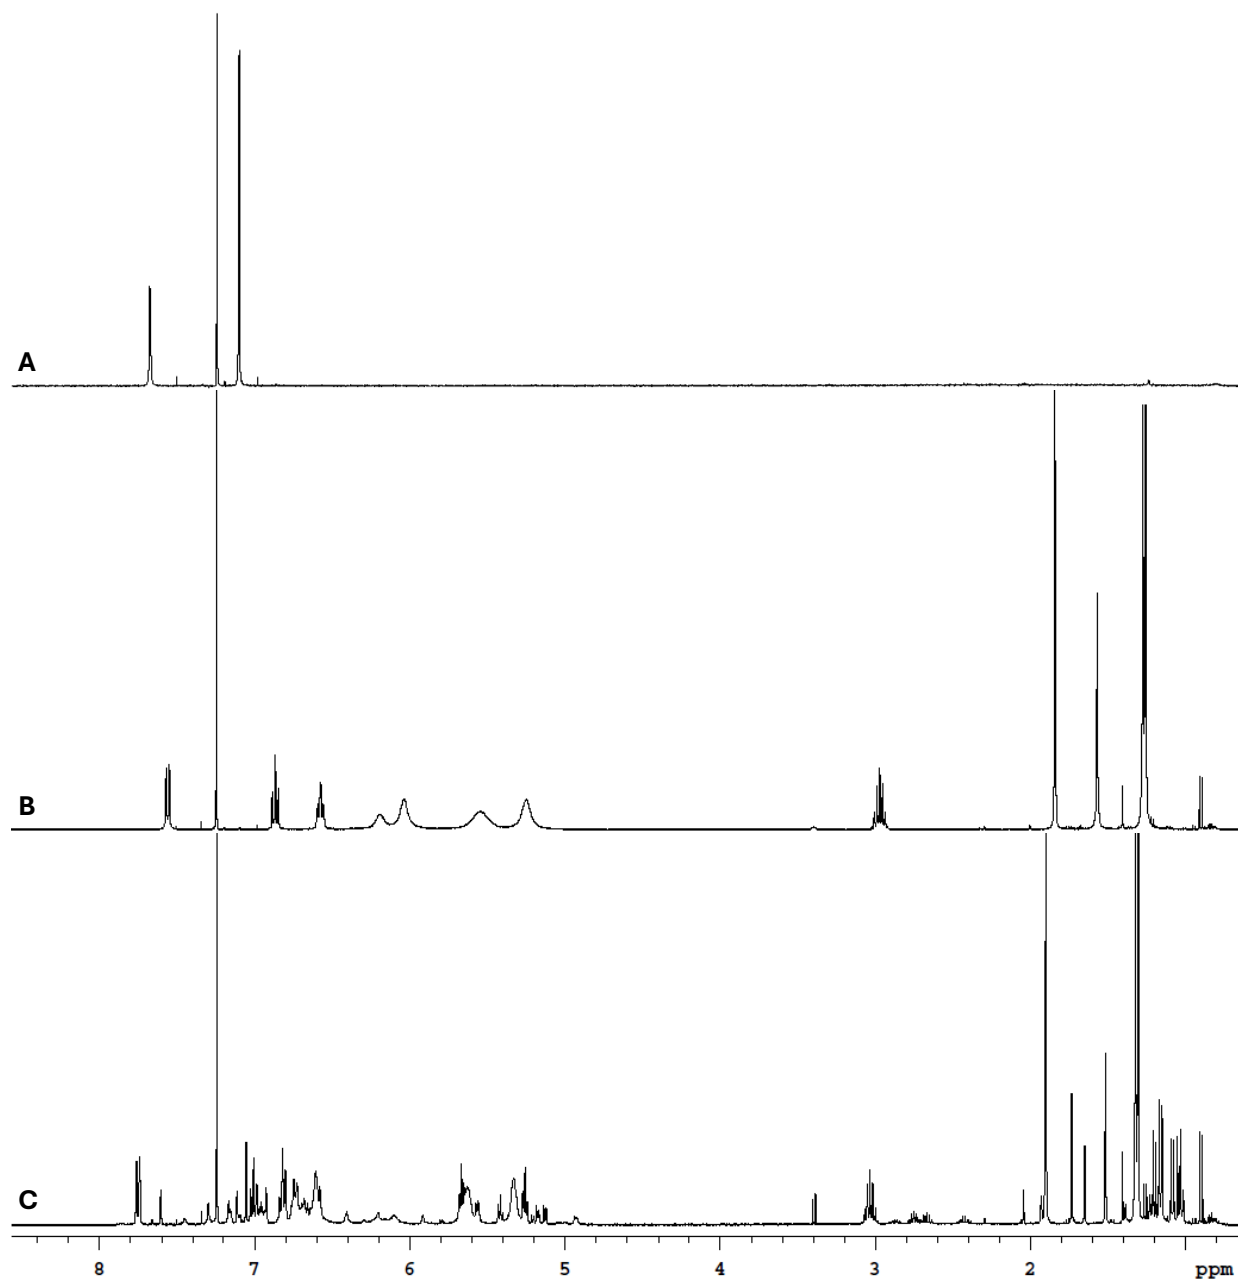

**Figure S33.**  $^1\text{H}$  NMR spectra in  $\text{CDCl}_3$  of complex **RuBN** ( $16\ \mu\text{M}$ ) with imidazole ( $16\ \mu\text{M}$ ). A: Imidazole alone, B: **RuBN** alone, C: Imidazole and **RuBN** immediately after mixing.



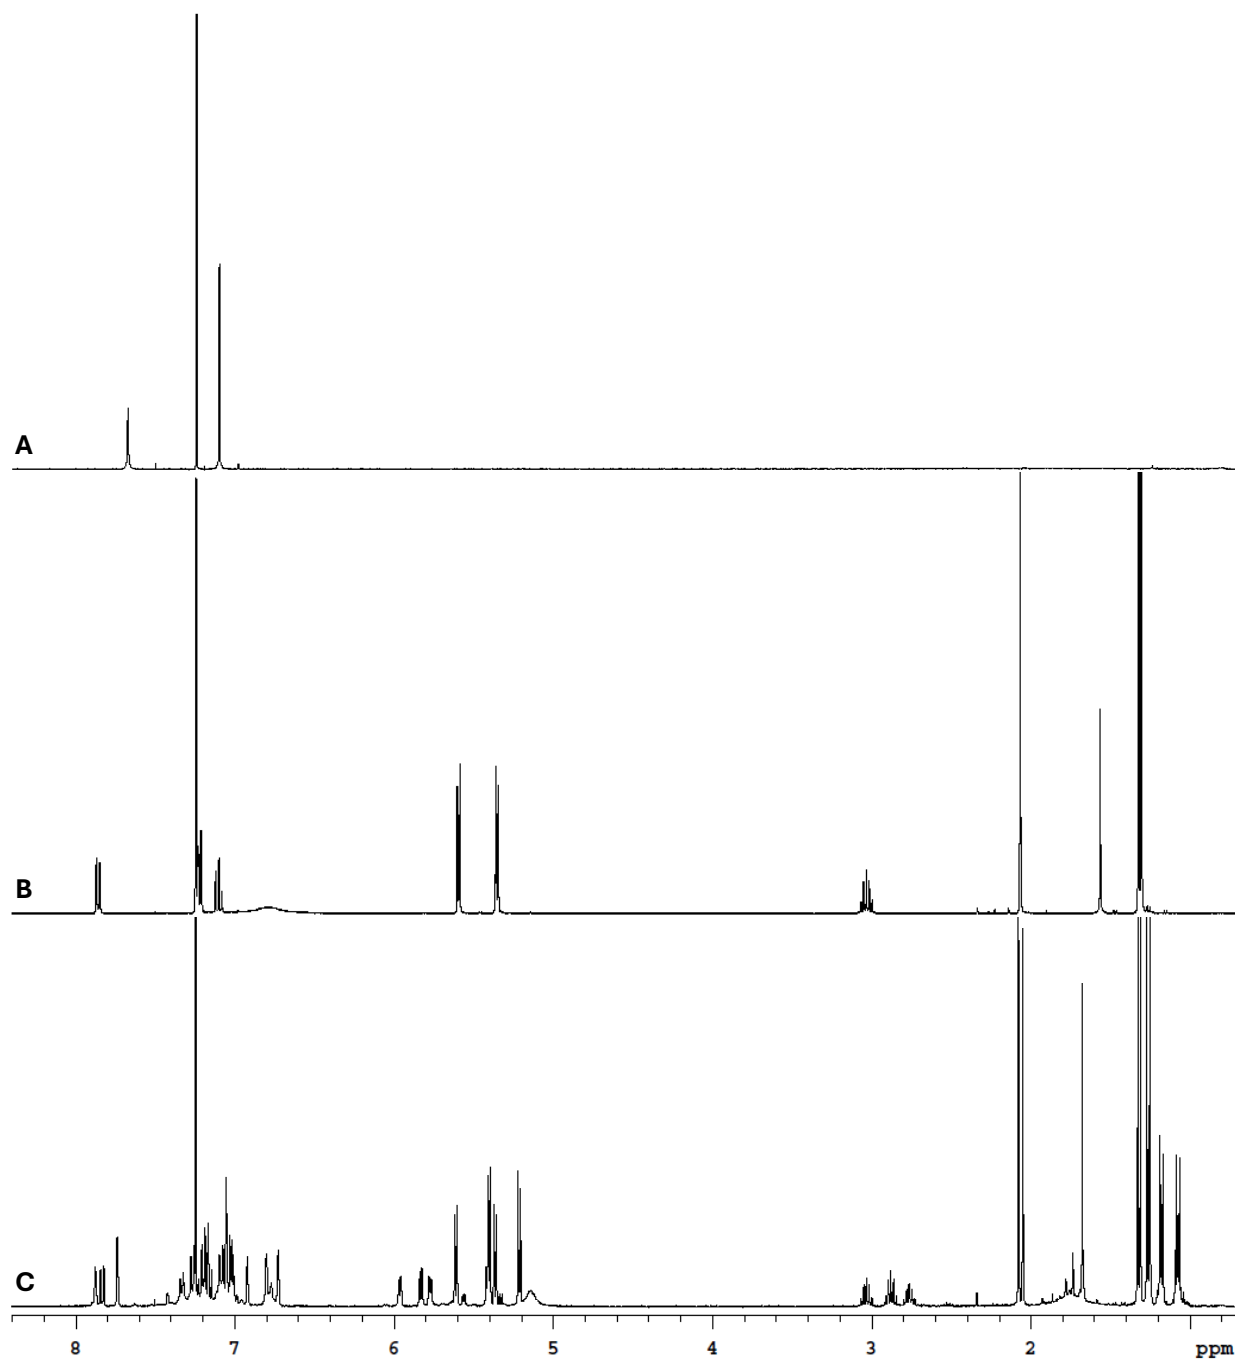

**Figure S34.**  $^1\text{H}$  NMR spectra in  $\text{CDCl}_3$  of complex **RuBO** ( $16\ \mu\text{M}$ ) with imidazole ( $16\ \mu\text{M}$ ). A: Imidazole alone, B: **RuBO** alone, C: Imidazole and **RuBO** immediately after mixing.

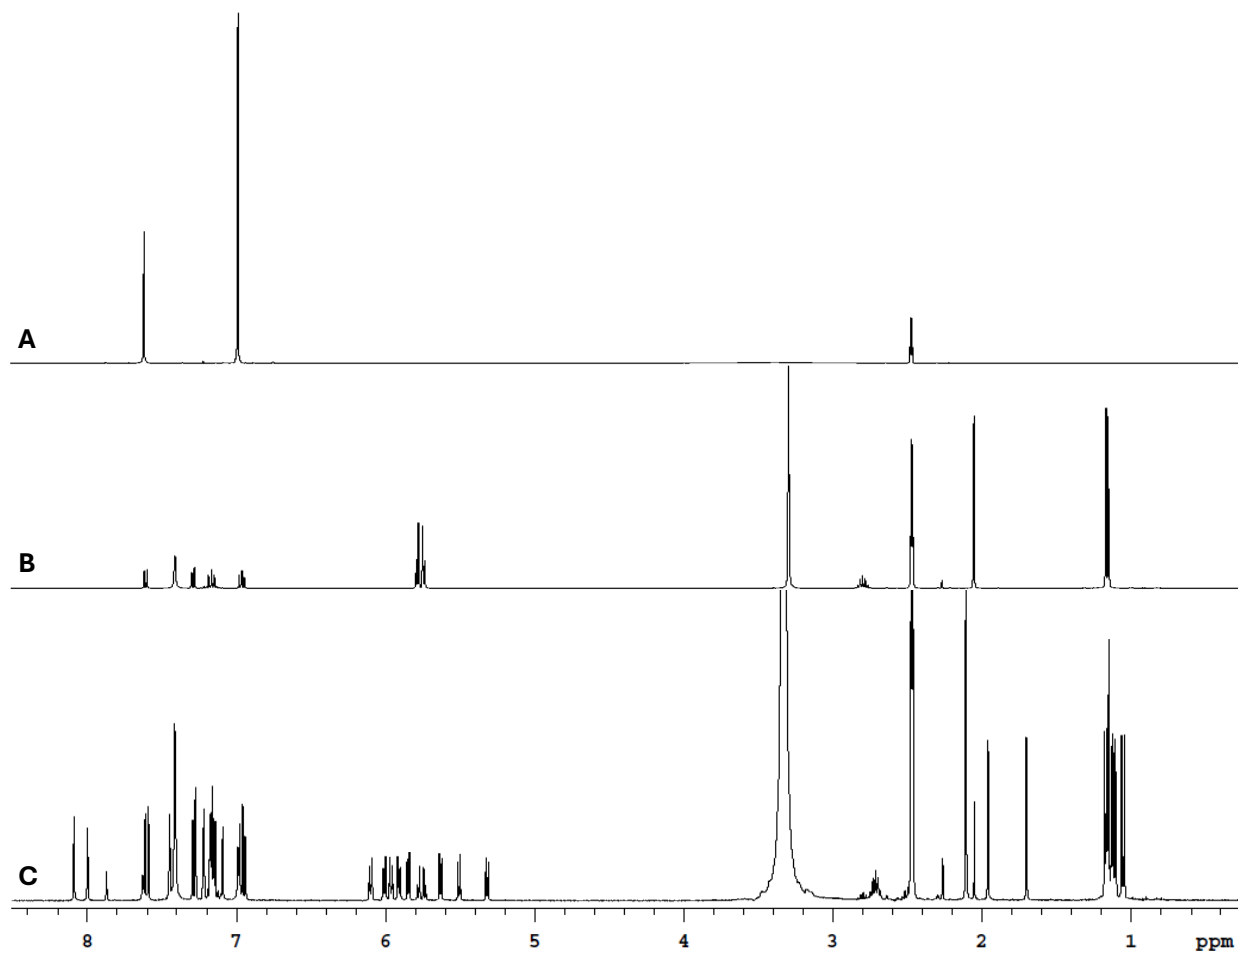

**Figure S35.**  $^1\text{H}$  NMR spectra in  $\text{DMSO-D}_6$  of complex **RuBS** ( $16\ \mu\text{M}$ ) with imidazole ( $16\ \mu\text{M}$ ). A: Imidazole alone, B: **RuBS** alone, C: Imidazole and **RuBS** immediately after mixing.

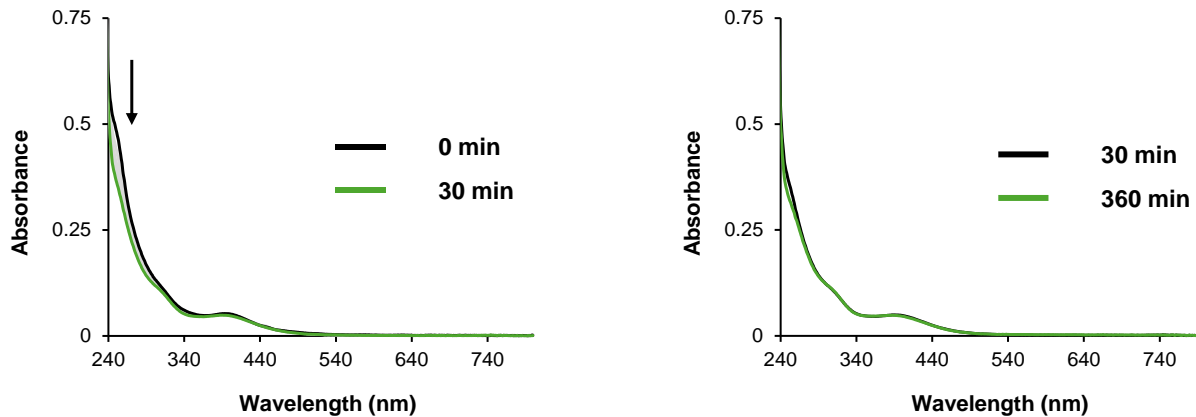

**Figure S36.** UV-Vis Spectra of RuO following mixing with an equimolar amount of imidazole (100  $\mu\text{M}$ ) and incubation in PBS (pH 7.4) at 37  $^{\circ}\text{C}$  for 30 minutes (left) then for 6 hours (right).

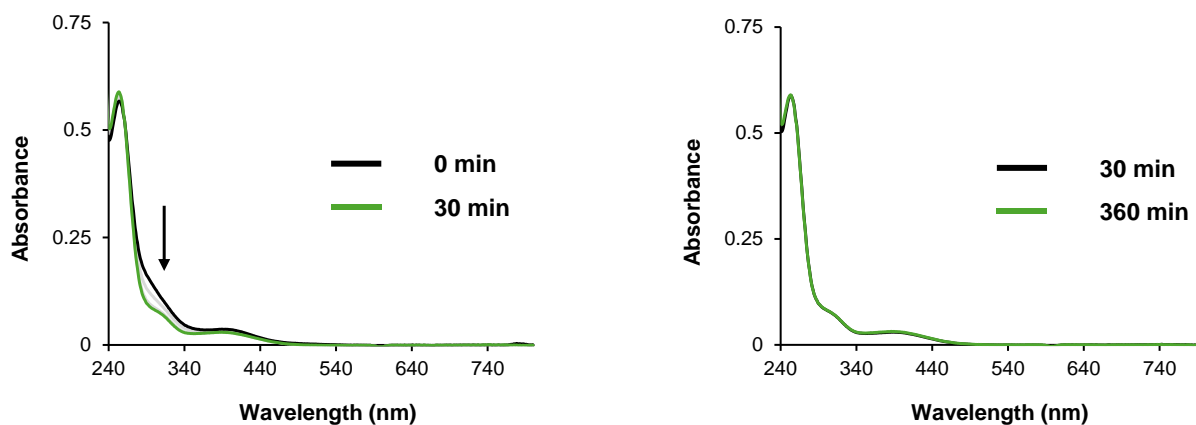

**Figure S37.** UV-Vis Spectra of RuS following mixing with an equimolar amount of imidazole (100  $\mu\text{M}$ ) and incubation in PBS (pH 7.4) at 37  $^{\circ}\text{C}$  for 30 minutes (left) then for 6 hours (right).

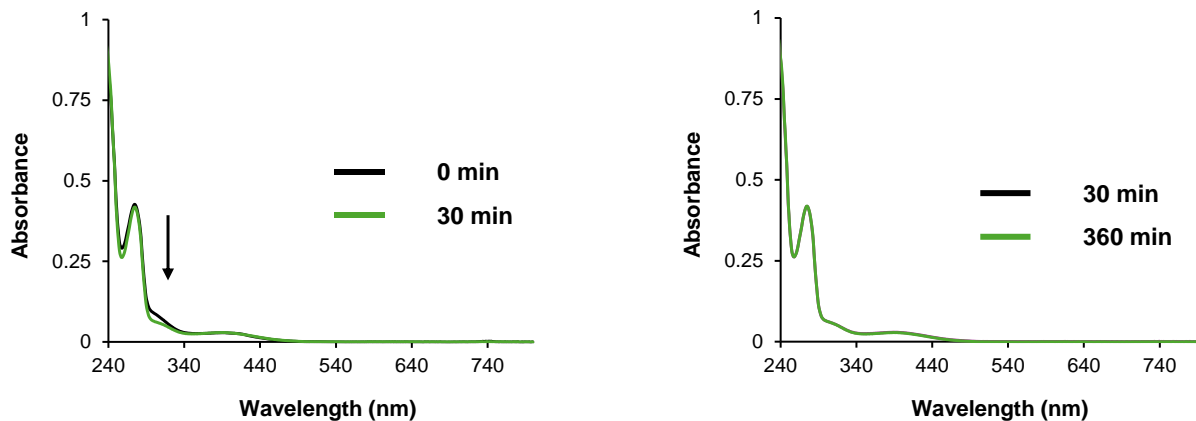

**Figure S38.** UV-Vis Spectra of **RuBO** following mixing with an equimolar amount of imidazole (100  $\mu$ M) and incubation in PBS (pH 7.4) at 37  $^{\circ}$ C for 30 minutes (left) then for 6 hours (right).

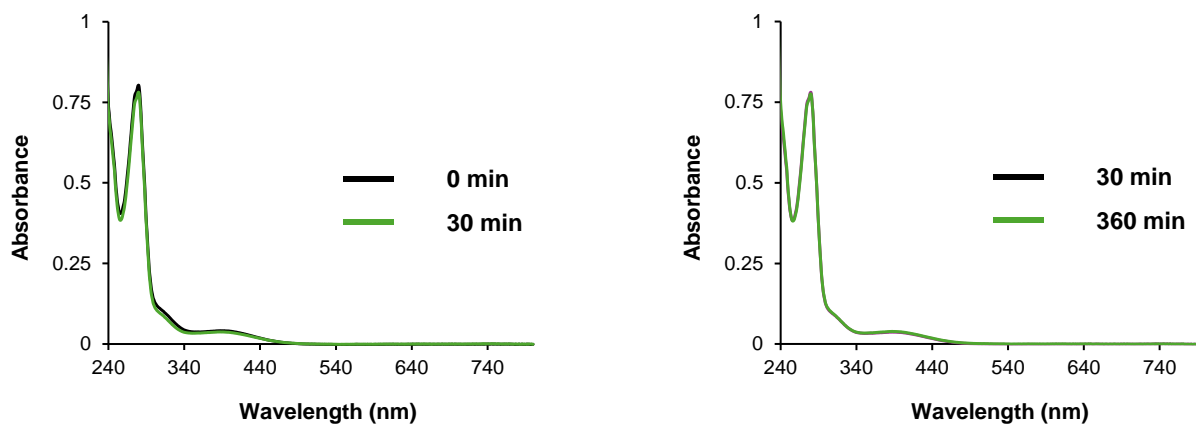

**Figure S39.** UV-Vis Spectra of **RuBN** following mixing with an equimolar amount of imidazole (100  $\mu$ M) and incubation in PBS (pH 7.4) at 37  $^{\circ}$ C for 30 minutes (left) then for 6 hours (right).

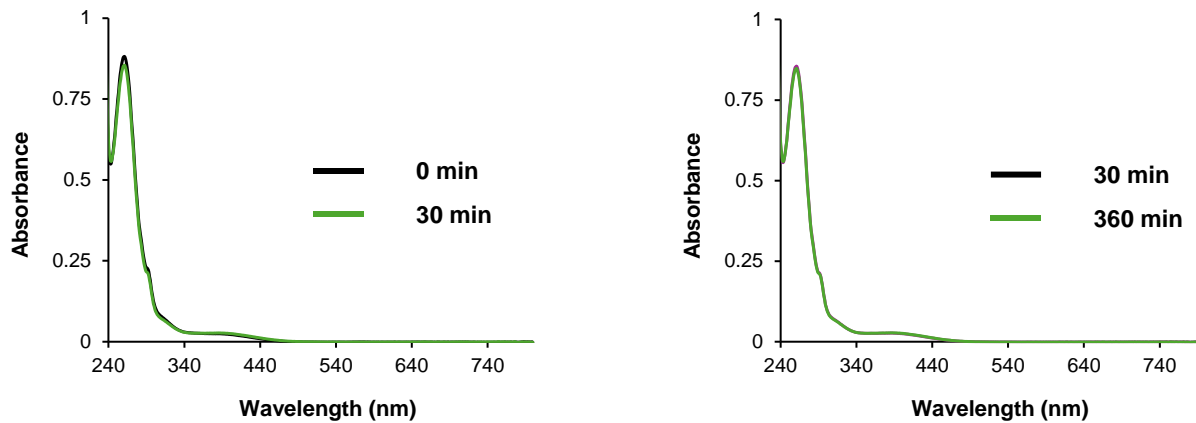

**Figure S40.** UV-Vis Spectra of **RuBS** following mixing with an equimolar amount of imidazole (100  $\mu$ M) and incubation in PBS (pH 7.4) at 37  $^{\circ}$ C for 30 minutes (left) then for 6 hours (right).

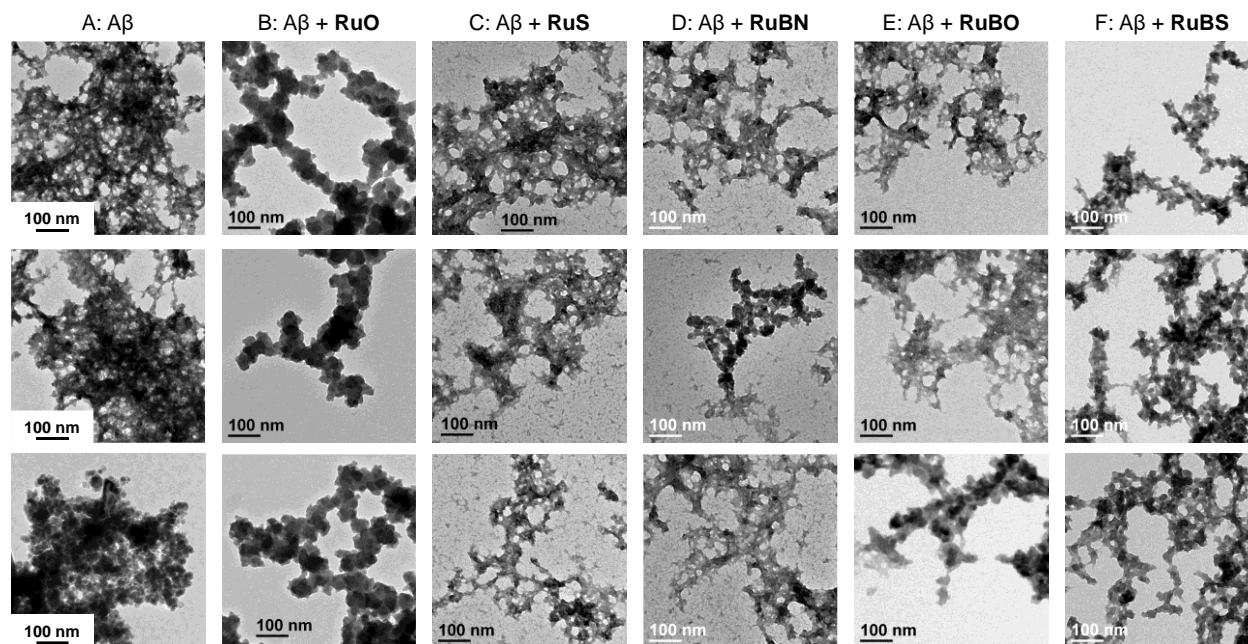

**Figure S41.** TEM images collected for all of the Ru complexes with A $\beta$ <sub>42</sub> from the DLS filtrates. Column A: A $\beta$  alone, Column B: A $\beta$  + RuO, Column C: A $\beta$  + RuS, Column D: A $\beta$  + RuBN, Column E: A $\beta$  + RuBO, Column F: A $\beta$  + RuBS. Scale bars are provided within each image.

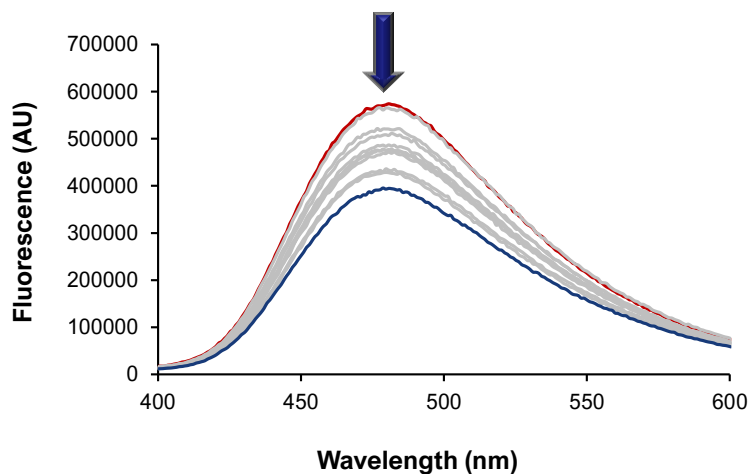

**Figure S42.** Fluorescence emission spectra at various Ru-HSA ratios by the titration of HSA-DG (1:1) with **RuO**. Experimental conditions:  $\lambda_{\text{ex}} = 330 \text{ nm}$ ,  $\lambda_{\text{em}} = 350\text{-}600 \text{ nm}$ ,  $[\text{HSA}] = [\text{DG}] = 2.5 \mu\text{M}$ ,  $[\text{Ru}] = 0\text{-}25 \mu\text{M}$ , in PBS (pH 7.4).

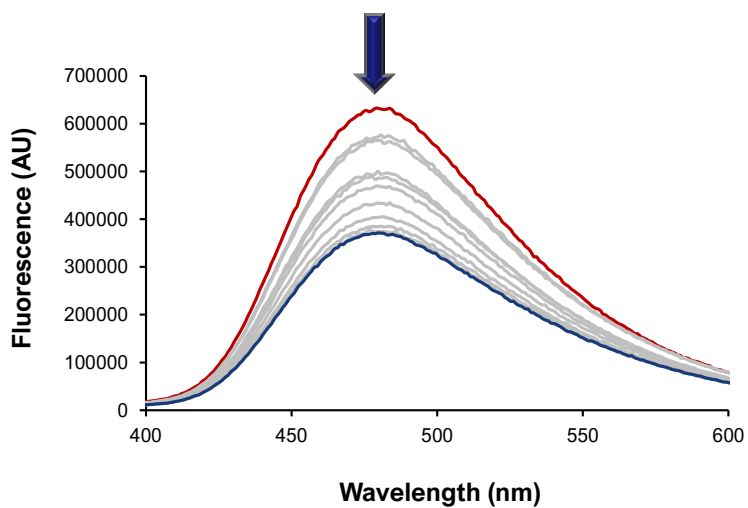

**Figure S43.** Fluorescence emission spectra at various Ru-HSA ratios by the titration of HSA-DG (1:1) with **RuS**. Experimental conditions:  $\lambda_{\text{ex}} = 330 \text{ nm}$ ,  $\lambda_{\text{em}} = 350\text{-}600 \text{ nm}$ ,  $[\text{HSA}] = [\text{DG}] = 2.5 \mu\text{M}$ ,  $[\text{Ru}] = 0\text{-}25 \mu\text{M}$ , in PBS (pH 7.4).

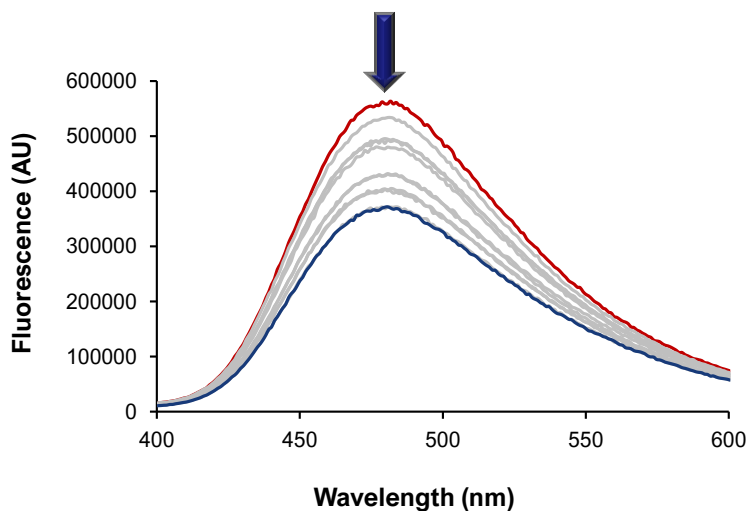

**Figure S44.** Fluorescence emission spectra at various Ru-HSA ratios by the titration of HSA-DG (1:1) with **RuBN**. Experimental conditions:  $\lambda_{\text{ex}} = 330 \text{ nm}$ ,  $\lambda_{\text{em}} = 350\text{-}600 \text{ nm}$ ,  $[\text{HSA}] = [\text{DG}] = 2.5 \text{ }\mu\text{M}$ ,  $[\text{Ru}] = 0\text{-}25 \text{ }\mu\text{M}$ , in PBS (pH 7.4).

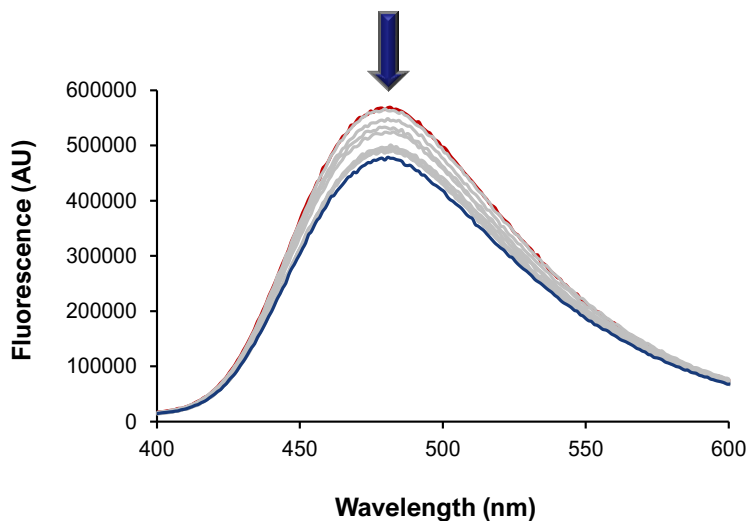

**Figure S45.** Fluorescence emission spectra at various Ru-HSA ratios by the titration of HSA-DG (1:1) with **RuBO**. Experimental conditions:  $\lambda_{\text{ex}} = 330 \text{ nm}$ ,  $\lambda_{\text{em}} = 350\text{-}600 \text{ nm}$ ,  $[\text{HSA}] = [\text{DG}] = 2.5 \text{ }\mu\text{M}$ ,  $[\text{Ru}] = 0\text{-}25 \text{ }\mu\text{M}$ , in PBS (pH 7.4).



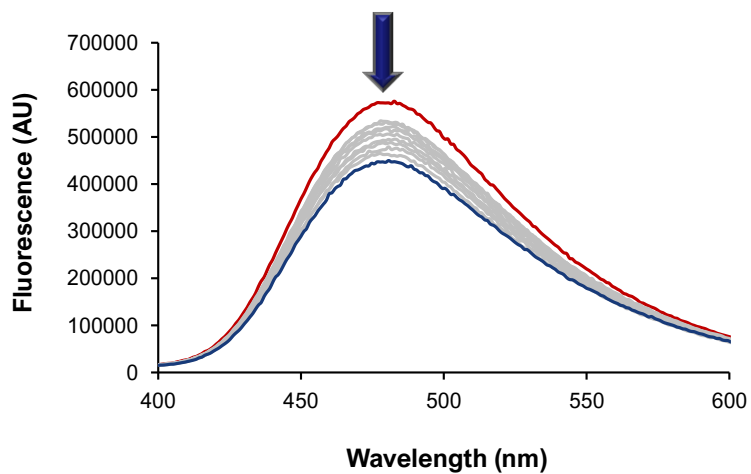

**Figure S46.** Fluorescence emission spectra at various Ru-HSA ratios by the titration of HSA-DG (1:1) with **RuBS**. Experimental conditions:  $\lambda_{\text{ex}} = 330 \text{ nm}$ ,  $\lambda_{\text{em}} = 350\text{-}600 \text{ nm}$ ,  $[\text{HSA}] = [\text{DG}] = 2.5 \text{ }\mu\text{M}$ ,  $[\text{Ru}] = 0\text{-}25 \text{ }\mu\text{M}$ , in PBS (pH 7.4).

**Table S2.** Crystal data and structure refinement for **RuO**.

|                                        |                                                             |                        |
|----------------------------------------|-------------------------------------------------------------|------------------------|
| CCDC Number                            | 2356322                                                     |                        |
| Empirical formula                      | C13 H18 Cl2 N2 O Ru                                         |                        |
| Formula weight                         | 390.26                                                      |                        |
| Temperature                            | 100.00(10) K                                                |                        |
| Wavelength                             | 1.54184 Å                                                   |                        |
| Crystal system                         | monoclinic                                                  |                        |
| Space group                            | $P2_1/n$                                                    |                        |
| Unit cell dimensions                   | $a = 9.84141(5)$ Å                                          | $a = 90^\circ$         |
|                                        | $b = 8.20452(6)$ Å                                          | $b = 96.4651(5)^\circ$ |
|                                        | $c = 18.14037(10)$ Å                                        | $g = 90^\circ$         |
| Volume                                 | 1455.411(15) Å <sup>3</sup>                                 |                        |
| Z                                      | 4                                                           |                        |
| Density (calculated)                   | 1.781 Mg/m <sup>3</sup>                                     |                        |
| Absorption coefficient                 | 12.041 mm <sup>-1</sup>                                     |                        |
| $F(000)$                               | 784                                                         |                        |
| Crystal color, morphology              | orange, block                                               |                        |
| Crystal size                           | 0.185 x 0.078 x 0.048 mm <sup>3</sup>                       |                        |
| Theta range for data collection        | 4.896 to 80.230°                                            |                        |
| Index ranges                           | $-7 \leq h \leq 12, -10 \leq k \leq 10, -23 \leq l \leq 23$ |                        |
| Reflections collected                  | 18727                                                       |                        |
| Independent reflections                | 3119 [ $R(\text{int}) = 0.0379$ ]                           |                        |
| Observed reflections                   | 3042                                                        |                        |
| Completeness to theta = 74.504°        | 99.7%                                                       |                        |
| Absorption correction                  | Multi-scan                                                  |                        |
| Max. and min. transmission             | 1.00000 and 0.62780                                         |                        |
| Refinement method                      | Full-matrix least-squares on $F^2$                          |                        |
| Data / restraints / parameters         | 3119 / 0 / 183                                              |                        |
| Goodness-of-fit on $F^2$               | 1.086                                                       |                        |
| Final $R$ indices [ $I > 2\sigma(I)$ ] | $R1 = 0.0232, wR2 = 0.0574$                                 |                        |
| $R$ indices (all data)                 | $R1 = 0.0238, wR2 = 0.0578$                                 |                        |
| Largest diff. peak and hole            | 0.453 and -0.800 e.Å <sup>-3</sup>                          |                        |

**Table S3.** Crystal data and structure refinement for **RuS**.

---

|                                        |                                                              |                |
|----------------------------------------|--------------------------------------------------------------|----------------|
| CCDC Number                            | 2356323                                                      |                |
| Empirical formula                      | C13 H18 Cl2 N2 Ru S                                          |                |
| Formula weight                         | 406.32                                                       |                |
| Temperature                            | 100.00(10) K                                                 |                |
| Wavelength                             | 1.54184 Å                                                    |                |
| Crystal system                         | orthorhombic                                                 |                |
| Space group                            | $P2_12_12_1$                                                 |                |
| Unit cell dimensions                   | $a = 9.01050(10)$ Å                                          | $a = 90^\circ$ |
|                                        | $b = 12.05820(10)$ Å                                         | $b = 90^\circ$ |
|                                        | $c = 14.31010(10)$ Å                                         | $g = 90^\circ$ |
| Volume                                 | 1554.80(2) Å <sup>3</sup>                                    |                |
| Z                                      | 4                                                            |                |
| Density (calculated)                   | 1.736 Mg/m <sup>3</sup>                                      |                |
| Absorption coefficient                 | 12.471 mm <sup>-1</sup>                                      |                |
| $F(000)$                               | 816                                                          |                |
| Crystal color, morphology              | orange, block                                                |                |
| Crystal size                           | 0.204 x 0.119 x 0.066 mm <sup>3</sup>                        |                |
| Theta range for data collection        | 4.796 to 80.227°                                             |                |
| Index ranges                           | $-10 \leq h \leq 11, -15 \leq k \leq 14, -18 \leq l \leq 18$ |                |
| Reflections collected                  | 17298                                                        |                |
| Independent reflections                | 3359 [ $R(\text{int}) = 0.0402$ ]                            |                |
| Observed reflections                   | 3344                                                         |                |
| Completeness to theta = 74.504°        | 100.0%                                                       |                |
| Absorption correction                  | Multi-scan                                                   |                |
| Max. and min. transmission             | 1.00000 and 0.48907                                          |                |
| Refinement method                      | Full-matrix least-squares on $F^2$                           |                |
| Data / restraints / parameters         | 3359 / 6 / 183                                               |                |
| Goodness-of-fit on $F^2$               | 1.111                                                        |                |
| Final $R$ indices [ $I > 2\sigma(I)$ ] | $R1 = 0.0252, wR2 = 0.0624$                                  |                |
| $R$ indices (all data)                 | $R1 = 0.0254, wR2 = 0.0624$                                  |                |
| Absolute structure parameter           | -0.004(6)                                                    |                |
| Largest diff. peak and hole            | 0.431 and -0.648 e.Å <sup>-3</sup>                           |                |

**Table S4.** Crystal data and structure refinement for **RuBO**.

---

|                                                     |                                                            |                |
|-----------------------------------------------------|------------------------------------------------------------|----------------|
| CCDC Number                                         | 2356324                                                    |                |
| Empirical formula                                   | C17 H20 Cl2 N2 O Ru                                        |                |
| Formula weight                                      | 440.32                                                     |                |
| Temperature                                         | 99.98(15) K                                                |                |
| Wavelength                                          | 1.54184 Å                                                  |                |
| Crystal system                                      | orthorhombic                                               |                |
| Space group                                         | <i>Pbca</i>                                                |                |
| Unit cell dimensions                                | $a = 7.65340(10)$ Å                                        | $a = 90^\circ$ |
|                                                     | $b = 18.62460(10)$ Å                                       | $b = 90^\circ$ |
|                                                     | $c = 24.3077(2)$ Å                                         | $g = 90^\circ$ |
| Volume                                              | 3464.86(6) Å <sup>3</sup>                                  |                |
| Z                                                   | 8                                                          |                |
| Density (calculated)                                | 1.688 Mg/m <sup>3</sup>                                    |                |
| Absorption coefficient                              | 10.199 mm <sup>-1</sup>                                    |                |
| <i>F</i> (000)                                      | 1776                                                       |                |
| Crystal color, morphology                           | orange, needle                                             |                |
| Crystal size                                        | 0.099 x 0.068 x 0.051 mm <sup>3</sup>                      |                |
| Theta range for data collection                     | 3.637 to 80.145°                                           |                |
| Index ranges                                        | $-9 \leq h \leq 9, -23 \leq k \leq 19, -28 \leq l \leq 31$ |                |
| Reflections collected                               | 30957                                                      |                |
| Independent reflections                             | 3724 [ <i>R</i> (int) = 0.0363]                            |                |
| Observed reflections                                | 3545                                                       |                |
| Completeness to theta = 74.504°                     | 100.0%                                                     |                |
| Absorption correction                               | Multi-scan                                                 |                |
| Max. and min. transmission                          | 1.00000 and 0.76953                                        |                |
| Refinement method                                   | Full-matrix least-squares on <i>F</i> <sup>2</sup>         |                |
| Data / restraints / parameters                      | 3724 / 0 / 219                                             |                |
| Goodness-of-fit on <i>F</i> <sup>2</sup>            | 1.072                                                      |                |
| Final <i>R</i> indices [ <i>I</i> > 2σ( <i>I</i> )] | <i>R</i> 1 = 0.0225, <i>wR</i> 2 = 0.0576                  |                |
| <i>R</i> indices (all data)                         | <i>R</i> 1 = 0.0236, <i>wR</i> 2 = 0.0582                  |                |
| Largest diff. peak and hole                         | 0.338 and -0.734 e.Å <sup>-3</sup>                         |                |
